# Supplementary material for: Exploring the association between urbanisation and self-rated health of older adults in China: evidence from a national population sample survey
Source: PubMed Central journal article supplement — BMJ Open. 2019 Jun 24;9(6):e029176. doi: 10.1136/bmjopen-2019-029176 (PMC6597632; doi:10.1136/bmjopen-2019-029176), 2019-06-24
Supplement: bmjopen-2019-029176.draft_revisions.pdf [file bmjopen-2019-029176.draft_revisions.pdf]

# BMJ Open

BMJ Open is committed to open peer review. As part of this commitment we make the peer review history of every article we publish publicly available.

When an article is published we post the peer reviewers' comments and the authors' responses online. We also post the versions of the paper that were used during peer review. These are the versions that the peer review comments apply to.

The versions of the paper that follow are the versions that were submitted during the peer review process. They are not the versions of record or the final published versions. They should not be cited or distributed as the published version of this manuscript.

BMJ Open is an open access journal and the full, final, typeset and author-corrected version of record of the manuscript is available on our site with no access controls, subscription charges or pay-per-view fees (<http://bmjopen.bmj.com>).

If you have any questions on BMJ Open's open peer review process please email [info.bmjopen@bmj.com](mailto:info.bmjopen@bmj.com)

# BMJ Open

## Exploring the association between urbanization and self-rated health of the elderly Chinese: Evidence from a national population sample survey

|                               |                                                                                                                                                                                                                                                                                                                                                                                                                                                                                                                                                                                                                                                                                                                                                                             |
|-------------------------------|-----------------------------------------------------------------------------------------------------------------------------------------------------------------------------------------------------------------------------------------------------------------------------------------------------------------------------------------------------------------------------------------------------------------------------------------------------------------------------------------------------------------------------------------------------------------------------------------------------------------------------------------------------------------------------------------------------------------------------------------------------------------------------|
| Journal:                      | <i>BMJ Open</i>                                                                                                                                                                                                                                                                                                                                                                                                                                                                                                                                                                                                                                                                                                                                                             |
| Manuscript ID                 | bmjopen-2019-029176                                                                                                                                                                                                                                                                                                                                                                                                                                                                                                                                                                                                                                                                                                                                                         |
| Article Type:                 | Research                                                                                                                                                                                                                                                                                                                                                                                                                                                                                                                                                                                                                                                                                                                                                                    |
| Date Submitted by the Author: | 15-Jan-2019                                                                                                                                                                                                                                                                                                                                                                                                                                                                                                                                                                                                                                                                                                                                                                 |
| Complete List of Authors:     | Liu, Ye; Sun Yat-Sen University, School of Geography and Planning; Sun Yat-Sen University, Guangdong Key Laboratory for Urbanization and Geo-simulation<br>Huang, Baishi; Sun Yat-Sen University, School of Geography and Planning; Sun Yat-Sen University, Guangdong Key Laboratory for Urbanization and Geo-simulation<br>Wang, Ruoyu; Sun Yat-Sen University, School of Geography and Planning; Sun Yat-Sen University, Guangdong Key Laboratory for Urbanization and Geo-simulation<br>Feng, Z; University of Southampton, Centre for Research on Ageing and ESRC Centre for Population Change<br>Liu, Yuqi; The University of Hong Kong, The Department of Urban Planning and Design, Faculty of Architecture<br>Li, Zhigang; Wuhan University, School of Urban Design |
| Keywords:                     | urbanization, self-rated health, older people, national population sample survey, China                                                                                                                                                                                                                                                                                                                                                                                                                                                                                                                                                                                                                                                                                     |
|                               |                                                                                                                                                                                                                                                                                                                                                                                                                                                                                                                                                                                                                                                                                                                                                                             |

SCHOLARONE™  
Manuscripts

1  
2  
3 **Exploring the association between urbanization and self-rated health of the**  
4 **elderly Chinese: Evidence from a national population sample survey**  
5  
6  
7

8 Ye Liu<sup>1,2</sup>, Baishi Huang<sup>1,2</sup>, Ruoyu Wang<sup>1,2</sup>, Zhixin Feng<sup>3</sup>, Yuqi Liu<sup>4</sup>, Zhigang Li<sup>5</sup>  
9

10  
11 <sup>1</sup>School of Geography and Planning, Sun Yat-Sen University, Guangzhou, China;

12 <sup>2</sup>Guangdong Key Laboratory for Urbanization and Geo-simulation, Sun Yat-Sen University,  
13 Guangzhou, China

14 <sup>3</sup> Centre for Research on Ageing and ESRC Centre for Population Change, School of Economics,  
15 Social and Political Sciences, Faculty of Social Sciences, University of Southampton,  
16 Southampton, Southampton, UK

17 <sup>4</sup>The Department of Urban Planning and Design, Faculty of Architecture, The University of Hong  
18 Kong, Hong Kong, China

19 <sup>5</sup>School of Urban Design, Wuhan University, Wuhan, China  
20  
21  
22

23  
24 **Corresponding author:**

25 Zhixin Feng, Centre for Research on Ageing, School of Economics, Social and Political Sciences,  
26 Faculty of Social Sciences, University of Southampton, UK, SO17 1BJ; +442380593859,  
27 frankfengs@gmail.com

28 Zhigang Li, School of Urban Design, Wuhan University, Wuhan 430072, China; +862787058902,  
29 zhigangli@whu.edu.cn  
30  
31

32  
33 **Keywords:** urbanization; self-rated health; older people; national population sample survey;  
34 China  
35  
36  
37  
38  
39  
40  
41  
42  
43  
44  
45  
46  
47  
48  
49  
50  
51  
52  
53  
54  
55  
56  
57  
58  
59  
60

## ABSTRACT

**Objectives** This study investigated the association between urbanization and self-rated health of elderly Chinese, particularly how different dimensions of urbanization are related to older people's health and how both the level and rate of urbanization are associated with their health.

**Design, participants and outcome measures** This study analysed 236,030 individuals (aged 60-79 years) nested within 267 prefecture-level cities from 2005 China's one per cent population sample survey. Self-rated health was the outcome variable. Four groups of predictors assessed prefectures' level and rate of urbanization: land-use conversion, economic growth, population concentration, and health services. Multilevel logistic regression was used to examine the association between self-rated health and the level and rate of urbanization, after adjusting for individual-level covariates. Multiplicative interactions explored variations by education.

## Results

The odds of reporting fair or poor health was negatively associated with the level and rate of population concentration and was positively associated with the level of health services. Land use conversion, economic growth, and health service improvements (the forms of rate of urbanization) were not significantly associated with their self-rated health. Education had a moderating effect on the association between urbanization and older people's self-rated health.

## Conclusions

Older people living in more densely-populated areas and areas undergoing rapid population concentration were less likely to report fair or poor health. This result supports healthy migration and "salmon bias" hypotheses. No urban health penalty was observed for the Chinese elderly, and therefore, the following pathways linking urbanization to health are unclear: lifestyle changes, environmental pollution, and cultivated land reduction.

## Strengths and limitations of this study

- ▶ The study takes into account the different dimensions of urbanization, thus capturing the complex association between urbanization and self-reported health of the Chinese elderly.
- ▶ The study provides an in-depth understanding of the urbanization-health relationship among the Chinese elderly.
- ▶ This study used nationally representative survey data covering 267 prefectures across 31 provinces, thus providing a more comprehensive picture of urbanization-health relationships across the country.
- ▶ we were unable to capture the causal effect of changes in urbanization over time on older peoples' health outcomes due to the cross-sectional nature of the data.

**Word count (abstract):** 252

**Word count (text excluding references, tables, figure legends):** 3357

## INTRODUCTION

The 2018 revision of World Urbanization Prospects reported that 55% of the world's population lived in urban settlements, and it is expected to increase to 68% by 2050.<sup>1</sup> A lion's share of the future growth of the world's urban population is expected to happen in developing nations.<sup>1</sup> In advanced economies, city dwellers normally enjoy better living conditions, better healthcare access, and more effective public-health interventions than their rural counterparts do. However, in developing countries, where urbanization is rapid and unplanned, it is more likely to pose a threat to public health through environmental degradation, unhealthy lifestyles, increased stress, and inadequate sanitation.<sup>2-5</sup>

China, the largest developing country in the world, has been undergoing urbanization at an unprecedented rate over the last three decades.<sup>1</sup> A small but growing body of literature has investigated the effect of urbanization on the Chinese population's health.<sup>6-13 14 15</sup> Most earlier studies used either a single indicator (e.g. urbanization rate) or a composite indicator derived from a set of neighbourhood characteristics (e.g. urbanicity index) to assess the level of urbanization and explore its relationship with individual health.<sup>6-11</sup> However, these studies have failed to recognise urbanization as a multi-faceted process that involves population concentration, economic growth, land-use conversion, infrastructure upgrading, and lifestyle changes, and that different aspects of urbanization may have complex effects on residents' health.<sup>5 16 17 18</sup> For example, the healthy migrant hypothesis suggests that a massive inflow of migrants to cities may improve the overall level of residents' health.<sup>19</sup> On the other hand, "salmon bias" hypothesis implies that those unhealthy migrants who are retired or are close to retirement age may return to their rural and small-town hometowns. It is a traditional Chinese culture: "Fallen leaves return to the roots" which stand for to revert to one's origin. Economic growth and land use change in rapidly industrializing countries are normally accompanied by increased environmental pollution, which is detrimental to residents' health.<sup>2 3 12</sup> On the other hand, economic growth may lead to better access to health knowledge and services, which could improve residents' health.<sup>5</sup> Lifestyle changes associated with urbanization, such as less physical activity and more high-calorie food intake, may also affect residents' health.<sup>8 20 21</sup> Therefore, considering the effects of multiple dimensions of urbanization on residents' health could provide a complete picture of how urbanization affects individual health.

Another limitation of previous studies is that the extent to which the urbanization rate influences residents' health has been rarely examined. For example, a previous study investigated the effect of living in more urbanized areas on health at a given time-point (i.e. urbanicity) in the Chinese context.<sup>6 8</sup> However, highly urbanized areas do not necessarily experience rapid urbanization.<sup>4 5 22</sup> The rate of urbanization also affects residents' health, as a rapid urban growth is usually accompanied by environmental and behavioural transitions, such as environmental deterioration, increased stress, lifestyle change, changing population composition, and declining social cohesion.<sup>2 4 5 8 20 23</sup> Only a few studies have considered both the level and rate of urbanization simultaneously. For example, Chen et al.<sup>16</sup> investigated the effects of urbanization on health using multiple measures of urbanization dynamics including the level and rate of urbanization; however, their conclusion was drawn from the analysis of a small-scale survey conducted in 27 prefectures, which had the limitations of poor generalizability and homogeneous environmental settings.<sup>24 25</sup> Therefore, including the rate of urbanization in the analytical framework of urbanization-health relationships is essential.

1  
2  
3  
4  
5  
6  
7  
8  
9  
10  
11  
12  
13  
14  
15  
16  
17  
18  
19  
20  
21  
22  
23  
24  
25  
26  
27  
28  
29  
30  
31  
32  
33  
34  
35  
36  
37  
38  
39  
40  
41  
42  
43  
44  
45  
46  
47  
48  
49  
50  
51  
52  
53  
54  
55  
56  
57  
58  
59  
60

Another research gap is the lack of investigation into the moderating effect of individual attributes on urbanization-health relationships. It is hypothesised that these relationships vary by education, as higher-educated and lower-educated people are likely to have different health practices and different levels of access to health services in large cities, whereas this educational gap is less pronounced in small towns and rural areas.<sup>26 27</sup> It is also hypothesised that highly-educated people and low-educated people have differing propensities to migrate, and the effect of health selective migration varies by education level.<sup>28</sup> Furthermore, higher-educated and lower-educated people differ in their ability to adapt to stress arising from rapid urbanization and consequent social life changes.<sup>5 20 29</sup> Therefore, the moderating effect of education on urbanization-health relationships among older people is worth exploring.

This study aimed to investigate the association between urbanization and self-rated health of elderly Chinese using the 2005 China's 1% population sample survey and statistical data from statistical yearbooks. In particular, the study focused on how different dimensions of urbanization (population growth, land use change, economic growth, and health service improvement) are related to older people's health and how both the level of and rate of urbanization are associated with their health. The study is significant in several respects. First, it takes into account the different dimensions of urbanization, thus capturing the complex association between urbanization and self-reported health of the Chinese elderly. Second, it provides an in-depth understanding of the urbanization-health relationship among the Chinese elderly. Moreover, this study used nationally representative survey data covering 267 prefectures across 31 provinces, thus providing a more comprehensive picture of urbanization-health relationships across the country.

## METHODS

### Data

This study used individual micro-data from the 2005 China's one per cent population sample survey (hereinafter, the 2005 survey). The 2005 survey was conducted by the National Bureau of Statistics of China using a stratified, cluster, and probability proportional to size (PPS) sampling. The 2005 survey included 2.59 million individuals living in 340 prefectures (including prefecture-level cities, prefectures in a narrow sense, leagues, and autonomous prefectures). We excluded individuals aged less than 60 years and further restricted the sample to those aged 60-79 years, as those aged over 80 years had a higher risk of mortality. The final dataset included 236,030 individuals from 267 prefecture-level cities. Since it is an analysis of secondary data, this study is exempt from ethics approval.

### Patient and public involvement

Patients or the public were not involved in this study.

### Measures

#### Outcome

The outcome variable in this study was self-reported health (SRH), which was the only question in the 2005 survey pertaining to health. SRH is a sensitive and reliable indicator of the current health status of older people, which has been widely used in previous studies.<sup>30-32</sup> Respondents were asked to assess their overall health status over the past month based on a 3-point scale (good, fair, or poor). To simplify the analysis, we recoded the variable into a binary variable: 0 for good

health and 1 for fair health or poor health.

### Predictors

The key predictors used to measure prefectures' urbanization level and rate included four specific dimensions of urbanization (land-use conversion, economic growth, population concentration, and health services). The ratio of urban built-up areas to the entire area, the GDP per capita, population density, and the number of hospital beds per thousand population were used to assess the level of rural-urban land use conversion, economic growth, population concentration, and health services, respectively. Further, the rates of land-use conversion, economic growth, concentration of population, and improvement in health services were considered using the changes in the corresponding indicators from 2000 to 2005.

### Covariates

We adjusted for individual-level covariates: gender, age, ethnicity, marital status, urbanicity of current residence, *hukou* status, education, primary endowment insurance, basic medical insurance, housing area per capita, housing construction time, and the provision of four types of housing facilities (water supply, kitchen, toilet and bathroom).

### Analysis

Multilevel logistic regression was used to examine the association between SRH and the level and rate of urbanization. The models were initially fitted with covariates only. We then added predictors related to both the level and rate of urbanization. Thereafter, these models were sequentially adjusted for interaction terms between the level or the speed of urbanization on one hand and education on the other. We performed a variance inflation factor (VIF) test and found no multicollinearity among the variables. All analyses were conducted using STATA 14.0.

## RESULTS

The descriptive analysis of the variables is presented in Table 1. Of all the respondents, 66.19% reported good health, 22.73% reported fair health, and 11.08% reported poor health. Respondents were more representative of the younger elderly cohorts, ethnic majority (Han Chinese), not married, local agricultural *hukou*, and individuals with low education (junior high school or below). Only 25% was included primary endowment insurance scheme, and about 40% were included basic medical insurance scheme. About 50% of the respondents lived in rural areas. The average housing area per capita is 32.57 square meters. About 77% lived in houses constructed after 1978, and 30% lived in houses with less than two types of facilities.

**Table 1** Summary statistics of variables

|                                                                 | Proportion/Mean (SD) |
|-----------------------------------------------------------------|----------------------|
| Self-reported health (%)                                        |                      |
| Good                                                            | 66.19                |
| Fair or poor                                                    | 33.81                |
| Predictors (prefecture-level variables)                         |                      |
| The ratio of urban built-up areas to the total area in 2005 (%) | 1.95 (3.48)          |
| GDP per capita in 2005 (10,000 Yuan)                            | 1.87 (1.49)          |

|    |                                                                                     |                 |
|----|-------------------------------------------------------------------------------------|-----------------|
| 1  |                                                                                     |                 |
| 2  |                                                                                     |                 |
| 3  | Population density in 2005 (population per km <sup>2</sup> )                        | 548.98 (443.51) |
| 4  | The number of hospital beds per thousand population in 2005 (bed)                   | 2.93 (1.53)     |
| 5  | The change in ratio of urban built-up areas from 2000 to 2005 (%)                   | 59.10 (88.93)   |
| 6  | The change in GDP per capita from 2000 to 2005 (%)                                  | 87.47 (41.19)   |
| 7  | The change in population density from 2000 to 2005 (%)                              | 3.40 (11.88)    |
| 8  | The change in number of hospital beds per thousand population from 2000 to 2005 (%) | 5.21 (13.46)    |
| 9  |                                                                                     |                 |
| 10 |                                                                                     |                 |
| 11 | Gender (%)                                                                          |                 |
| 12 | Female                                                                              | 48.74           |
| 13 | Male                                                                                | 51.26           |
| 14 |                                                                                     |                 |
| 15 | Age (%)                                                                             |                 |
| 16 | 60-64                                                                               | 33.64           |
| 17 | 65-69                                                                               | 28.49           |
| 18 | 70-74                                                                               | 23.09           |
| 19 | 75-79                                                                               | 14.78           |
| 20 |                                                                                     |                 |
| 21 | Ethnicity (%)                                                                       |                 |
| 22 | Han Chinese                                                                         | 96.49           |
| 23 | Minority                                                                            | 3.51            |
| 24 |                                                                                     |                 |
| 25 | Marital status (%)                                                                  |                 |
| 26 | Single, divorced, or widowed                                                        | 75.34           |
| 27 | Married                                                                             | 24.66           |
| 28 |                                                                                     |                 |
| 29 | <i>Hukou</i> status (%)                                                             |                 |
| 30 | Local agricultural                                                                  | 63.77           |
| 31 | Local non-agricultural                                                              | 28.68           |
| 32 | Non-local agricultural                                                              | 2.33            |
| 33 | Non-local non-agricultural                                                          | 5.18            |
| 34 |                                                                                     |                 |
| 35 | Education (%)                                                                       |                 |
| 36 | No schooling                                                                        | 34.73           |
| 37 | Elementary school or junior high school                                             | 55.04           |
| 38 | Senior high school                                                                  | 6.12            |
| 39 | College or above                                                                    | 4.11            |
| 40 |                                                                                     |                 |
| 41 | Primary endowment insurance (%)                                                     |                 |
| 42 | Attended                                                                            | 24.68           |
| 43 | Did not attend                                                                      | 75.32           |
| 44 |                                                                                     |                 |
| 45 | Basic Medical insurance (%)                                                         |                 |
| 46 | Attended                                                                            | 41.44           |
| 47 | Did not attend                                                                      | 58.56           |
| 48 |                                                                                     |                 |
| 49 | Urbanicity of current residence (%)                                                 |                 |
| 50 | Rural areas                                                                         | 52.20           |
| 51 | Urban areas: towns                                                                  | 14.87           |
| 52 | Urban areas: cities                                                                 | 32.93           |
| 53 |                                                                                     |                 |
| 54 | Housing area per capita (m <sup>2</sup> )                                           | 32.57 (25.98)   |
| 55 |                                                                                     |                 |
| 56 | Housing construction time (%)                                                       |                 |
| 57 | Before 1978                                                                         | 22.62           |
| 58 | After 1978                                                                          | 77.38           |
| 59 |                                                                                     |                 |
| 60 |                                                                                     |                 |



|                                      |       |
|--------------------------------------|-------|
| Housing facilities (%)               |       |
| None, one or two types of facilities | 30.91 |
| Three types of facilities            | 24.84 |
| Four types of facilities             | 29.52 |

Table 2 presents the results of the multilevel logistic regression. Model 1 includes covariates only. Older people who were female, of advanced age, not married, and less-educated were more likely to report fair or poor health than were their male, younger, married, and more-educated counterparts. Local and agricultural *hukou* holders were more likely to report fair or poor health than were their non-local and non-agricultural counterparts. Primary endowment insurance recipients and urban residents were less likely to report fair or poor health than were non-recipients and rural residents. Moreover, older people who lived in larger, more recently constructed and better-equipped houses were less likely to report fair or poor health than those living in smaller, older, and less-equipped houses.

**Table 2** Multilevel logistic regression estimates of reporting fair or poor health

| Effects and Variables                                                           | Model 1<br>OR (95% CI) | Model 2<br>OR (95% CI) |
|---------------------------------------------------------------------------------|------------------------|------------------------|
| Fixed part                                                                      |                        |                        |
| The ratio of urban built-up areas to the total area in 2005                     |                        | 0.99 (0.97 - 1.01)     |
| The change in ratio of urban built-up areas from 2000 to 2005                   |                        | 0.96 (0.90 - 1.02)     |
| The logarithm GDP per capita in 2005                                            |                        | 0.91 (0.81 - 1.01)     |
| The change in GDP per capita from 2000 to 2005                                  |                        | 0.94 (0.85 - 1.05)     |
| The logarithm population density in 2005                                        |                        | 0.93 (0.87 - 0.99) *   |
| The change in population density from 2000 to 2005                              |                        | 0.74 (0.59 - 0.93) **  |
| The number of hospital beds per thousand population in 2005                     |                        | 1.12 (1.06 - 1.19) *** |
| The change in number of hospital beds per thousand population from 2000 to 2005 |                        | 0.91 (0.67 - 1.25)     |
| Females (ref: males)                                                            | 1.16 (1.14 - 1.19) *** | 1.16 (1.14 - 1.19) *** |
| Age (ref: 60-64)                                                                |                        |                        |
| 65-69                                                                           | 1.81 (1.77 - 1.86) *** | 1.81 (1.77 - 1.86) *** |
| 70-74                                                                           | 3.19 (3.10 - 3.27) *** | 3.19 (3.11 - 3.27) *** |
| 75-79                                                                           | 4.66 (4.53 - 4.80) *** | 4.67 (4.53 - 4.81) *** |
| Minority (ref: Han Chinese)                                                     | 1.05 (1.00 - 1.11)     | 1.05 (0.99 - 1.10)     |
| Single, divorced, or widowed (ref: married)                                     | 1.30 (1.28 - 1.33) *** | 1.30 (1.28 - 1.33) *** |
| <i>Hukou</i> status (ref: local agricultural)                                   |                        |                        |
| Local non-agricultural                                                          | 0.92 (0.89 - 0.95) *** | 0.91 (0.88 - 0.94) *** |
| Non-local agricultural                                                          | 0.73 (0.69 - 0.78) *** | 0.73 (0.69 - 0.78) *** |
| Non-local non-agricultural                                                      | 0.83 (0.78 - 0.87) *** | 0.82 (0.78 - 0.87) *** |
| Education (ref: no schooling)                                                   |                        |                        |
| Elementary school or junior high school                                         | 0.68 (0.67 - 0.70) *** | 0.68 (0.67 - 0.70) *** |
| Senior high school                                                              | 0.60 (0.57 - 0.63) *** | 0.60 (0.57 - 0.63) *** |
| College or above                                                                | 0.55 (0.52 - 0.58) *** | 0.55 (0.52 - 0.58) *** |
| Had primary endowment insurance (ref: did not attend)                           | 0.88 (0.85 - 0.91) *** | 0.88 (0.85 - 0.91) *** |
| Had Basic Medical insurance (ref: did not attend)                               | 0.98 (0.95 - 1.00)     | 0.98 (0.95 - 1.00)     |

|                                                         |                        |                        |
|---------------------------------------------------------|------------------------|------------------------|
| Urbanicity of current residence (ref: rural areas)      |                        |                        |
| Urban areas: towns                                      | 0.87 (0.84 - 0.89) *** | 0.87 (0.84 - 0.89) *** |
| Urban areas: cities                                     | 0.87 (0.84 - 0.90) *** | 0.87 (0.84 - 0.89) *** |
| Housing area per capita (m <sup>2</sup> )               | 0.99 (1.00 - 1.00) *** | 0.99 (0.99 - 1.00) *** |
| Housing construction time after 1978 (ref: before 1978) | 0.88 (0.86 - 0.90) *** | 0.88 (0.86 - 0.90) *** |
| Housing facilities (ref: none, one and two)             |                        |                        |
| Three                                                   | 0.99 (0.96 - 1.01)     | 0.99 (0.96 - 1.01)     |
| Four                                                    | 0.82 (0.80 - 0.85) *** | 0.83 (0.80 - 0.85) *** |
| Var (city-level constant)                               | 0.14***                | 0.11***                |
| Log likelihood                                          | -135659.94             | -135632.03             |
| AIC                                                     | 271363.90              | 271324.10              |
| ICC                                                     | 0.04                   | 0.03                   |

Note: OR: odds ratio; 95% confidence intervals in brackets; \* p<0.05 to \*\* p<0.01 to \*\*\* p<0.001

The results of Model 2 show that the level and the rate of population concentration were negatively associated with the odds of reporting fair or poor health (level: OR (95% CI) = 0.93 (0.87-0.99); rate: OR (95% CI) = 0.74 (0.59-0.93)), while the level of health services was positively correlated with the odds of reporting fair or poor health (OR (95% CI) = 1.12 (1.06-1.19)). There was no significant relationship between the odds of reporting fair or poor health and the level of land use conversion, economic growth (land use conversion: OR (95% CI) = 0.99 (0.97-1.01); economic growth: OR (95% CI) = 0.91 (0.81-1.01)). Similarly, no significant relationship was observed between the odds of reporting fair or poor health and land use conversion rate, economic growth rate, and health service improvement (land use conversion rate: OR (95% CI) = 0.96 (0.9-1.02); economic growth rate: OR (95% CI) = 0.94 (0.85-1.05); health service improvement: OR (95% CI) = 0.91 (0.67-1.25)).

The results of the moderating effect of education on the association between the level of urbanization and SRH are shown in Table 3. The level of land use conversion was negatively associated with the SRH of the least educated (OR (95% CI) = 0.98 (0.96-1.00)) and positively associated with the odds of those who had completed primary education reporting fair or poor health (OR (95% CI) = 1.02 (1.02-1.03), 1.04 (1.03-1.05), and 1.03 (1.02-1.05)) (Model 3). The level of economic growth was not significantly associated with the SRH of the least educated (OR (95% CI) = 0.95 (0.88-1.02)) and were positively associated with that of other educational groups (OR (95% CI) = 1.08 (1.05-1.12), 1.19 (1.11-1.26), and 1.14 (1.05-1.24)) (Model 4). The level of population concentration was negatively correlated with the odds of reporting fair or poor health across all educational groups, and the strength of the negative relationship decreased with a higher level of education (OR (95% CI) = 0.84 (0.79-0.89), 1.08 (1.05-1.10), 1.19 (1.13-1.26), and 1.19 (1.11-1.28)) (Model 5). The level of health services was positively correlated with the odds of reporting fair or poor health across all educational groups with the strongest positive relationship found in senior high school (OR (95% CI) = 1.05 (1.01-1.09), 1.04 (1.02-1.05), 1.07 (1.04-1.10), and 1.04 (1.00-1.07)) (Model 6).

**Table 3** The relationship between the level of urbanization and the odds of reporting fair or poor health moderated by education

| Variables                                                         | Model 3 (IV: ratio of urban built-up areas) | Model 4 (IV: GDP per capita) | Model 5 (IV: population density) | Model 6 (IV: health institutional beds per 1000 population) |
|-------------------------------------------------------------------|---------------------------------------------|------------------------------|----------------------------------|-------------------------------------------------------------|
|                                                                   | OR (95% CI)                                 | OR (95% CI)                  | OR (95% CI)                      | OR (95% CI)                                                 |
| The level of urbanization in 2005                                 | 0.98 (0.96 - 1.00) *                        | 0.95 (0.88 - 1.02)           | 0.84 (0.79 - 0.89) ***           | 1.05 (1.01 - 1.09) *                                        |
| The speed of urbanization from 2000 to 2005                       | 0.92 (0.87 - 0.98) *                        | 0.98 (0.88 - 1.08)           | 0.73 (0.58 - 0.92) **            | 0.79 (0.58 - 1.08)                                          |
| Education (ref: no schooling)                                     |                                             |                              |                                  |                                                             |
| Elementary school or junior high school                           | 0.69 (0.67 - 0.70) ***                      | 0.69 (0.67 - 0.70) ***       | 0.69 (0.67 - 0.70) ***           | 0.69 (0.67 - 0.70) ***                                      |
| Senior high school                                                | 0.59 (0.56 - 0.62) ***                      | 0.59 (0.56 - 0.62) ***       | 0.59 (0.56 - 0.62) ***           | 0.59 (0.55 - 0.62) ***                                      |
| College or above                                                  | 0.53 (0.50 - 0.57) ***                      | 0.54 (0.50 - 0.58) ***       | 0.53 (0.50 - 0.57) ***           | 0.55 (0.51 - 0.59) ***                                      |
| The level of urbanization * education (ref: level * no schooling) |                                             |                              |                                  |                                                             |
| Level * elementary school or junior high school                   | 1.02 (1.02 - 1.03) ***                      | 1.08 (1.05 - 1.12) ***       | 1.08 (1.05 - 1.10) ***           | 1.04 (1.02 - 1.05) ***                                      |
| Level * senior high school                                        | 1.04 (1.03 - 1.05) ***                      | 1.19 (1.11 - 1.26) ***       | 1.19 (1.13 - 1.26) ***           | 1.07 (1.04 - 1.10) ***                                      |
| Level * college or above                                          | 1.03 (1.02 - 1.05) ***                      | 1.14 (1.05 - 1.24) **        | 1.19 (1.11 - 1.28) ***           | 1.04 (1.00 - 1.07) *                                        |

Note: OR odds ratio; 95% confidence intervals in brackets; \* p<0.05, \*\* p<0.01, \*\*\* p<0.001. All models have been adjusted for individual covariates shown in Table 2.

Table 4 presents the results of the moderating effect of education in the association between the speed of urbanization and SRH. The speed of land use conversion was negatively correlated with the SRH of the least educated (OR (95% CI) = 0.92 (0.86-0.98)) and not significantly associated with the odds of those who had completed primary education reporting fair or poor health (OR (95% CI) = 1.01 (0.99-1.04), 1.04 (0.99-1.10), and 1.06 (1.00-1.13)) (Model 7). Economic growth rate was negatively correlated with the odds of those who had junior high school or below reporting fair or poor health (OR (95% CI) = 0.95 (0.91-1.00)) and not significantly correlated with other educational groups' SRH (OR (95% CI) = 1.00 (0.90-1.12), 0.94 (0.84-1.05), and 0.96 (0.84-1.10)) (Model 8). The rate of population concentration was negatively associated with the odds of those without schooling reporting fair or poor health (OR (95% CI) = 0.73 (0.56-0.94)) and not significantly associated with that of those who had senior high school education (OR (95% CI) = 0.99 (0.81-1.22), 1.48 (0.97-2.24), and 0.89 (0.52-1.51)) (Model 9). The rate of health service improvement was positively correlated with the SRH of the most educated (OR (95% CI) = 1.88 (1.21-2.94)) (Model 10).

**Table 4** The relationship between the speed of urbanization and the odds of reporting fair or poor health moderated by education

| Variables                                                         | Model 7 (IV: ratio of urban built-up areas)<br>OR (95% CI) | Model 8 (IV: logarithm GDP per capita)<br>OR (95% CI) | Model 9 (IV: logarithm population density)<br>OR (95% CI) | Model 10 (IV: health institutional beds per 1000 population)<br>OR (95% CI) |
|-------------------------------------------------------------------|------------------------------------------------------------|-------------------------------------------------------|-----------------------------------------------------------|-----------------------------------------------------------------------------|
| The level of urbanization in 2005                                 | 1.00 (0.98 - 1.02)                                         | 1.00 (0.93 - 1.07)                                    | 0.88 (0.83 - 0.93) ***                                    | 1.07 (1.04 - 1.11) ***                                                      |
| The speed of urbanization from 2000 to 2005                       | 0.92 (0.86 - 0.98) **                                      | 1.00 (0.90 - 1.12)                                    | 0.73 (0.56 - 0.94) *                                      | 0.79 (0.57 - 1.09)                                                          |
| Education (ref: no schooling)                                     |                                                            |                                                       |                                                           |                                                                             |
| Elementary school or junior high school                           | 0.68 (0.67 - 0.70) ***                                     | 0.68 (0.67 - 0.70) ***                                | 0.68 (0.67 - 0.70) ***                                    | 0.68 (0.67 - 0.70) ***                                                      |
| Senior high school                                                | 0.60 (0.57 - 0.63) ***                                     | 0.60 (0.57 - 0.63) ***                                | 0.60 (0.57 - 0.63) ***                                    | 0.60 (0.57 - 0.63) ***                                                      |
| College or above                                                  | 0.55 (0.52 - 0.58) ***                                     | 0.55 (0.52 - 0.58) ***                                | 0.55 (0.52 - 0.58) ***                                    | 0.55 (0.52 - 0.58) ***                                                      |
| The speed of urbanization * education (ref: speed * no schooling) |                                                            |                                                       |                                                           |                                                                             |
| Speed * elementary school or junior high school                   | 1.01 (0.99 - 1.04)                                         | 0.95 (0.91 - 1.00) *                                  | 0.99 (0.81 - 1.22)                                        | 0.98 (0.85 - 1.13)                                                          |
| Speed * senior high school                                        | 1.04 (0.99 - 1.10)                                         | 0.94 (0.84 - 1.05)                                    | 1.48 (0.97 - 2.24)                                        | 1.03 (0.72 - 1.46)                                                          |
| Speed * college or above                                          | 1.06 (1.00 - 1.13)                                         | 0.96 (0.84 - 1.10)                                    | 0.89 (0.52 - 1.51)                                        | 1.88 (1.21 - 2.94) **                                                       |

Note: OR odds ratio; 95% confidence intervals in brackets; \* p<0.05, \*\* p<0.01, \*\*\* p<0.001. All models have been adjusted for individual covariates shown in Table 2.

## DISCUSSION

This study is the first to examine the association between the multiple dimensions of urbanization and SRH among elderly Chinese using nationally-representative survey data covering most of the prefectures in China. In contrast to previous studies examining urban health penalty in Chinese people across all ages,<sup>6-8 16</sup> our findings show that living in more densely-populated areas and areas undergoing rapid population concentration decreases older people's odds of reporting fair or poor health. This can be partially attributed to healthy migration and the "salmon bias" phenomenon.<sup>19 28</sup> Fast-growing and densely populated cities draw numerous healthy and working-aged migrants from rural and small-town areas, and most of these migrants still perceive themselves to be healthy when they cross the age of 60 years (healthy migration phenomenon). Migrants who perceive themselves to be unhealthy are likely to return to their rural and small-town hometowns when they are retired or are close to retirement age ("salmon bias" phenomenon). It is a traditional Chinese culture that people would revert to their origin when they are old. On the other hand, unhealthy older migrants would go back to their hometowns to avoid high healthcare expenditure in urban areas. The health selective migration partially accounts for the positive association between population concentration and SRH.

Earlier studies have attributed urban health penalty in China to changes in health behaviours associated with urbanization.<sup>7 8 16</sup> Specifically, people living in more urbanized areas are more likely to have unhealthy lifestyles, such as insufficient physical activity and high-fat and high-calorie intake.<sup>7 8 16</sup> Nevertheless, our study found no evidence that economic growth and population concentration may have a detrimental effect on people's SRH. This suggests that the pathway of lifestyle is less pronounced for older people than for the working-age population in China, as many older people living in well-developed and densely populated areas still maintain their existing healthy lifestyle (i.e., more physical activities and less high-fat and high-calorie intake) which was established many years ago (when China was a less developed and isolated country). Another pathway of urban health penalty involves environmental pollution and decrease in cultivated land.<sup>2 8 12</sup> However, our results show no relationship between land use conversion and economic growth on the one hand and older people's SRH on the other, which suggests that environmental pollution and decrease in cultivated land might play little role in the association between urbanization and older people's SRH.

Urbanization may also positively affect people's health through improved healthcare services and quality of life.<sup>5</sup> These pathways are associated with two dimensions of urbanization, economic growth and health service improvements, which are found to be either non-significantly or counter-intuitively positively related to older people's odds of reporting fair or poor health. Economic growth was not accompanied by an increase in older people's odds of reporting fair or poor health, probably because health benefits as a result of economic growth might be offset by associated detrimental effects such as environmental deterioration, increased stress, and weakened social bonds. Surprisingly, the level of health services was positively associated with the odds of older people reporting fair or poor health, and health service improvement was not linked to an increase in older people's odds of reporting fair or poor health. One possible explanation for this finding is that older people living in areas with better health services are more likely to receive health knowledge and be aware of their trivial illnesses, and thus, may report themselves as unhealthy.

1  
2  
3 Education had a moderating effect on the association between each of the four dimensions of  
4 urbanization and older people's SRH. Land use conversion was negatively associated with the  
5 odds of the least educated individuals reporting fair or poor health. One explanation is that older  
6 people without education are indigenous peasants living in their home villages. Those living in  
7 areas with a high proportion of urban land and areas that undergo rapid land use conversion  
8 usually have a better economic well-being and quality of life than do their less-urbanized  
9 counterparts, and thus report a better health status. The effects of land use conversion and  
10 economic growth on older people's SRH are more detrimental to those who are more educated,  
11 probably because health behaviours differ greatly between those who are more educated and those  
12 who are less educated in economically developed areas.<sup>7 33</sup> People with a higher level of education  
13 are more likely to consume more food than needed and adopt a new lifestyle than do less-educated  
14 people. Moreover, high-fat and high-calorie diets and sedentary behaviour are more prevalent in  
15 economically developed areas. By contrast, the educational gap in health behaviours is less  
16 pronounced in less-developed areas, as educated people in these areas do not have an unhealthy  
17 diet and sedentary behaviour.<sup>7</sup> The negative effect of population concentration on older people's  
18 likelihood of reporting fair or poor health was stronger for the less-educated than for the  
19 more-educated, probably because in the Chinese context, the effect of healthy selective migration  
20 is stronger for less-educated people who are often manual labourers and whose employment  
21 opportunities rely on their physical health conditions. The relationship between the level of health  
22 service and fair or poor SRH was positive; the rate of health service improvement was positively  
23 correlated with fair or poor SRH for the most educated individuals. This suggests that they tend to  
24 have stronger health awareness and higher expectations regarding their health when already living  
25 in areas with a high level of health services.

26  
27 This study has some limitations. First, we were unable to capture the causal effect of changes  
28 in urbanization over time on older peoples' health outcomes due to the cross-sectional nature of  
29 the data. Second, our estimates of the effect of urbanization on health might be subject to  
30 self-selection bias, as older people with certain observed or unobserved characteristics (e.g. having  
31 well-educated parents) are more likely to live in more urbanized areas and report better health than  
32 are those who do not have those characteristics. Given that the middle-aged and older people in  
33 China have a low migration rate, we can assume that self-selection bias is not a severe issue for  
34 the present study. Third, we did not explore the pathways (e.g. health behaviours, the use of  
35 health-care facilities and services, and social capital) through which urbanization affects SRH due  
36 to the lack of relevant information in our dataset.

37  
38 In conclusion, the results show that the odds of older people reporting fair or poor health is  
39 negatively correlated with the level and rate of population concentration and is positively  
40 correlated with the level of health services. These findings support the healthy migration and  
41 "salmon bias" hypotheses. Education had a moderating effect on the association between each of  
42 the four dimensions of urbanization and older people's SRH. The possible explanations for the  
43 difference between more educated and less educated older people in terms of urbanization-health  
44 relationships include healthy selective migration, differing quality of life, differing health  
45 behaviours, and varying health expectations. Public efforts such as the equitable distribution of  
46 health services and the elimination of social exclusion of migrants should be made to decrease  
47 health inequalities among older people in China.

1  
2  
3  
4  
5 **Acknowledgments** Data used in this paper is from the 2005 China's one per cent population  
6 sample survey by the National Bureau of Statistics of China. The authors appreciate the assistance  
7 in providing data by the institutes and individuals aforementioned. The views expressed herein are  
8 the authors.  
9

10  
11 **Contributors** YL, BH, ZF and ZL conceived the research question and designed the study. BH  
12 and RW performed statistical analysis. YL and BH drafted the manuscript, all authors contributed  
13 to the subsequent revisions of the manuscript, and approved the final version of the submitted  
14 manuscript.  
15

16  
17 **Funding** This research was funded by the National Natural Science Foundation of China (No.  
18 41871140, No. 41422103, No. 41771167), Innovative Research and Development Team  
19 Introduction Program of Guangdong Province (No. 2017ZT07X355) and Guangzhou Science &  
20 Technology Project Applied Basic Research Programs (20183700042050443) supported this  
21 research.  
22  
23

24  
25 **Competing interests** None declared.  
26

27  
28 **Data sharing statement** There are no additional data available.  
29  
30  
31  
32  
33  
34  
35  
36  
37  
38  
39  
40  
41  
42  
43  
44  
45  
46  
47  
48  
49  
50  
51  
52  
53  
54  
55  
56  
57  
58  
59  
60

**REFERENCES**

- 1 United Nations, Department of Economic and Social Affairs, Population Division. The 2018 revision of the world urbanization prospects; 2018. <https://population.un.org/wup/Publications/Files/WUP2018-PressRelease.pdf> (accessed 15 Oct 2018).
- 2 Gong P, Liang S, Carlton EJ, et al. Urbanisation and health in China. *The Lancet* 2012;379(9818):843-852.
- 3 Moore M, Gould P, Keary BS. Global urbanization and impact on health. *Int J Hyg Envir Heal* 2003;206(4-5):269-278.
- 4 Vlahov D, Freudenberg N, Proietti F, et al. Urban as a determinant of health. *J Urban Health* 2007;84(1):16-26.
- 5 Vlahov D, Galea S. Urbanization, urbanicity, and health. *J Urban Health* 2002;79(Suppl 1):S1-S12.
- 6 Chen H, Liu Y, Li Z, et al. Urbanization, economic development and health: evidence from China's labor-force dynamic survey. *Int J Equity Health* 2017;16(1):207-214.
- 7 Miao J, Wu X. Urbanization, socioeconomic status and health disparity in China. *Health Place* 2016;42:87-95.
- 8 Van de Poel E, O'Donnell O, Van Doorslaer E. Is there a health penalty of China's rapid urbanization? *Health Econ* 2012;21(4):367-385.
- 9 Van de Poel E, O'Donnell O, Van Doorslaer E. Urbanization and the spread of diseases of affluence in China. *Econ Hum Biol* 2009;7(2):200-216.
- 10 Jones-Smith JC, Popkin BM. Understanding community context and adult health changes in China: development of an urbanicity scale. *Soc Sci Med* 2010;71(8):1436-1446.
- 11 Thompson AL, Houck KM, Adair L, et al. Multilevel examination of the association of urbanization with inflammation in Chinese adults. *Health Place* 2014;28:177-186.
- 12 Li X, Song J, Lin T, et al. Urbanization and health in China, thinking at the national, local and individual levels. *Environ Health-Glob* 2016;15:113-123.
- 13 Li X, Wang C, Zhang G, et al. Urbanisation and human health in China: spatial features and a systemic perspective. *Environ Sci Pollut R* 2012;19(5):1375-1384.
- 14 Wang R, Xue D, Liu Y, et al. The relationship between urbanization and depression in China: the mediating role of neighborhood social capital. *Int J Equity Health* 2018;17:105-114.
- 15 Sun R, Gu D. Air pollution, economic development of communities, and health status among the elderly in urban China. *Am J Epidemiol* 2008;168(11):1311-1318.
- 16 Chen J, Chen S, Landry PF, et al. How dynamics of urbanization affect physical and mental health in urban China. *China Quart* 2014;220:988-1011.
- 17 Chen H, Liu Y, Zhu Z, et al. Does where you live matter to your health? Investigating factors that influence the self-rated health of urban and rural Chinese residents: evidence drawn from Chinese General Social Survey data. *Health Qual Life Out* 2017;15(1):78-88.
- 18 Villanueva K, Pereira G, Knuiman M, et al. The impact of the built environment on health across the life course: design of a cross-sectional data linkage study. *BMJ Open* 2013;3:e002482.
- 19 Abraído-Lanza AF, Dohrenwend BP, Ng-Mak DS, et al. The Latino mortality paradox: a test of the "salmon bias" and healthy migrant hypotheses. *Am J Public Health* 1999;89(10):1543-1548.
- 20 Harpham T. Urbanization and mental health in developing countries: a research role for social scientists, public health professionals and social psychiatrists. *Soc Sci Med* 1994;39(2):233-245.
- 21 Abuladze L, Kunder N, Lang K, et al. Associations between self-rated health and health behaviour among older adults in Estonia: a cross-sectional analysis. *BMJ Open* 2017;7:e013257.
- 22 Ng SW, Norton EC, Popkin BM. Why have physical activity levels declined among Chinese adults? Findings from the 1991-2006 China health and nutrition surveys. *Soc Sci Med* 2009;68(7):1305-1314.
- 23 Chen M, Zhang H, Liu W, et al. The global pattern of urbanization and economic growth: evidence from the



- 1  
2  
3 last three decades. *Plos One* 2014;9(8):e103799.
- 4 24 Xu Z, Ouyang A. The factors influencing China's population distribution and spatial heterogeneity: a  
5 prefectural-level analysis using geographically weighted regression. *Appl Spat Anal Polic* 2018;11(3):465-480.
- 6 25 Xiang H, Yang J, Zhang T, et al. Analyzing in-migrants and out-migrants in urban China. *Appl Spat Anal Polic*  
7 2018;11(1):81-102.
- 8  
9 26 Mackenbach JP, Irina S, Roskam AJR, et al. Socioeconomic inequalities in health in 22 European countries.  
10 *New Engl J Med* 2008;358(23):2468-2481.
- 11 27 Ross CE, Mirowsky J. Refining the association between education and health: the effects of quantity,  
12 credential, and selectivity. *Demography* 1999;36(4):445-460.
- 13 28 Norman P, Boyle P, Rees P. Selective migration, health and deprivation: a longitudinal analysis. *Soc Sci Med*  
14 2005;60(12):2755-2771.
- 15 29 Feng Z, Phillips DR, Jones K. A geographical multivariable multilevel analysis of social exclusion among older  
16 people in China: evidence from the China Longitudinal Aging Social Survey ageing study. *The Geographical*  
17 *Journal* 2018;184(4):413-428.
- 18 30 Feng Z, Wang WW, Jones K. A multilevel analysis of the role of the family and the state in self-rated health of  
19 elderly Chinese. *Health Place* 2013;23:148-156.
- 20 31 Wu Z, Schimmele CM. Psychological disposition and self-reported health among the 'oldest-old' in China.  
21 *Ageing Soc* 2006;26(1):135-151.
- 22 32 Lima-Costa MF, Cesar CC, Chor D, et al. Self-rated health compared with objectively measured health status as  
23 a tool for mortality risk screening in older adults: 10-year follow-up of the Bambuí Cohort Study of Aging.  
24 *AM J Epidemiol* 2012;175(3):228-235.
- 25 33 Kinge JM, Strand BH, Vollset SE, et al. Educational inequalities in obesity and gross domestic product:  
26 evidence from 70 countries. *J Epidemiol Community Health* 2015;69(12):1141-1146.
- 27  
28  
29  
30  
31  
32  
33  
34  
35  
36  
37  
38  
39  
40  
41  
42  
43  
44  
45  
46  
47  
48  
49  
50  
51  
52  
53  
54  
55  
56  
57  
58  
59  
60

# BMJ Open

## Exploring the association between urbanization and self-rated health of the older adults in China: Evidence from a national population sample survey

|                                 |                                                                                                                                                                                                                                                                                                                                                                                                                                                                                                                                                                                                                                                                                                                                                                   |
|---------------------------------|-------------------------------------------------------------------------------------------------------------------------------------------------------------------------------------------------------------------------------------------------------------------------------------------------------------------------------------------------------------------------------------------------------------------------------------------------------------------------------------------------------------------------------------------------------------------------------------------------------------------------------------------------------------------------------------------------------------------------------------------------------------------|
| Journal:                        | <i>BMJ Open</i>                                                                                                                                                                                                                                                                                                                                                                                                                                                                                                                                                                                                                                                                                                                                                   |
| Manuscript ID                   | bmjopen-2019-029176.R1                                                                                                                                                                                                                                                                                                                                                                                                                                                                                                                                                                                                                                                                                                                                            |
| Article Type:                   | Research                                                                                                                                                                                                                                                                                                                                                                                                                                                                                                                                                                                                                                                                                                                                                          |
| Date Submitted by the Author:   | 06-May-2019                                                                                                                                                                                                                                                                                                                                                                                                                                                                                                                                                                                                                                                                                                                                                       |
| Complete List of Authors:       | Liu, Ye; Sun Yat-Sen University, School of Geography and Planning; Sun Yat-Sen University, Guangdong Key Laboratory for Urbanization and Geo-simulation<br>Huang, Baishi; Sun Yat-Sen University, School of Geography and Planning; Sun Yat-Sen University, Guangdong Key Laboratory for Urbanization and Geo-simulation<br>Wang, Ruoyu; Sun Yat-Sen University, School of Geography and Planning; Sun Yat-Sen University, Guangdong Key Laboratory for Urbanization and Geo-simulation<br>Feng, Z; University of Southampton, Primary Care and Population Sciences, Faculty of Medicine<br>Liu, Yuqi; The University of Hong Kong, The Department of Urban Planning and Design, Faculty of Architecture<br>Li, Zhigang; Wuhan University, School of Urban Design |
| <b>Primary Subject Heading</b>: | Public health                                                                                                                                                                                                                                                                                                                                                                                                                                                                                                                                                                                                                                                                                                                                                     |
| Secondary Subject Heading:      | Global health                                                                                                                                                                                                                                                                                                                                                                                                                                                                                                                                                                                                                                                                                                                                                     |
| Keywords:                       | urbanization, self-rated health, older people, national population sample survey, China                                                                                                                                                                                                                                                                                                                                                                                                                                                                                                                                                                                                                                                                           |
|                                 |                                                                                                                                                                                                                                                                                                                                                                                                                                                                                                                                                                                                                                                                                                                                                                   |

SCHOLARONE™  
Manuscripts

1  
2  
3  
4  
5  
6  
7  
8  
9  
10  
11  
12  
13  
14  
15  
16  
17  
18  
19  
20  
21  
22  
23  
24  
25  
26  
27  
28  
29  
30  
31  
32  
33  
34  
35  
36  
37  
38  
39  
40  
41  
42  
43  
44  
45  
46  
47  
48  
49  
50  
51  
52  
53  
54  
55  
56  
57  
58  
59  
60

1 **Exploring the association between urbanization and self-rated health of the older**  
2 **adults in China: Evidence from a national population sample survey**

3  
4 Ye Liu<sup>1,2</sup>, Baishi Huang<sup>1,2</sup>, Ruoyu Wang<sup>1,2</sup>, Zhixin Feng<sup>3</sup>, Yuqi Liu<sup>4</sup>, Zhigang Li<sup>5</sup>

5  
6 <sup>1</sup>School of Geography and Planning, Sun Yat-Sen University, Guangzhou, China;

7 <sup>2</sup>Guangdong Key Laboratory for Urbanization and Geo-simulation, Sun Yat-Sen University,  
8 Guangzhou, China

9 <sup>3</sup> Primary Care and Population Sciences, Faculty of Medicine, University of Southampton,  
10 Southampton, Southampton, UK

11 <sup>4</sup>The Department of Urban Planning and Design, Faculty of Architecture, The University of Hong  
12 Kong, Hong Kong, China

13 <sup>5</sup>School of Urban Design, Wuhan University, Wuhan, China  
14

15 **Corresponding author:**

16 Zhixin Feng, Room AB230, Level B, South Academic Block, University Hospital Southampton,  
17 Primary Care and Population Sciences, Faculty of Medicine, University of Southampton,  
18 Southampton, SO16 6YD, United Kingdom; +44 (0)23 8120 6533, frankfengs@gmail.com

19 Zhigang Li, School of Urban Design, Wuhan University, Wuhan 430072, China; +862787058902,  
20 zhigangli@whu.edu.cn  
21

22 **Keywords:** urbanization; self-rated health; older people; national population sample survey;  
23 China  
24

## 25 ABSTRACT

26 **Objectives** This study investigated the association between urbanization and self-rated health of  
27 older adults in China, particularly how different dimensions, rate, and level of urbanization are  
28 related to older people's. Additionally, it examined the moderating effect of education on the  
29 association between each of the four dimensions of urbanization and older people's health.

30  
31 **Design** The study uses a cross-sectional survey design.

## 34 Participants

35 This study analyzed 236,030 individuals (aged 60-79 years) nested within 267 prefecture-level  
36 cities from 2005 China's 1% population sample survey.

37  
38 **Outcome measures** Self-rated health was the outcome variable. Four groups of predictors  
39 assessed prefectures' level and rate of urbanization: land-use conversion, economic growth,  
40 population concentration, and health services. Multilevel logistic regression was used to examine  
41 the association between self-rated health and the level and rate of urbanization, after adjusting for  
42 individual-level covariates. Multiplicative interactions explored variations by education.

## 44 Results

45 The odds of reporting fair or poor health was negatively associated with the level and rate of  
46 population concentration (OR=0.93 (95%CI 0.87 to 0.99) and 0.74, (95%CI 0.59 to 0.93)  
47 respectively) and positively associated with the level of health services (OR=1.12, 95%CI 1.06 to  
48 1.19). Land-use conversion, economic growth, and health service improvements (the forms of rate  
49 of urbanization) were not significantly associated with self-rated health. Education had a  
50 moderating effect on the association between urbanization and self-rated health.

## 52 Conclusions

53 Older people living in more densely-populated areas and areas undergoing rapid population  
54 concentration were less likely to report fair or poor health. This result supports healthy migration  
55 and "salmon bias" hypotheses. No urban health penalty was observed for the older adults in  
56 China; therefore, the following pathways linking urbanization to health are unclear: lifestyle  
57 changes, environmental pollution, and cultivated land reduction.

## 59 Strengths and limitations of this study

- 60 ▶ The study considers the different dimensions of urbanization, thus capturing the complex  
61 association between urbanization and self-reported health of older adults in China.
- 62 ▶ It provides an in-depth understanding of the urbanization-health relationship among older  
63 adults.
- 64 ▶ The study used nationally representative survey data covering 267 prefectures across 31  
65 provinces, thus providing a more comprehensive picture of urbanization-health relationships  
66 across the country.
- 67 ▶ We were unable to capture the causal effect of changes in urbanization over time on older  
68 peoples' health outcomes due to the cross-sectional nature of the data.

1  
2  
3  
4  
5  
6  
7  
8  
9  
10  
11  
12  
13  
14  
15  
16  
17  
18  
19  
20  
21  
22  
23  
24  
25  
26  
27  
28  
29  
30  
31  
32  
33  
34  
35  
36  
37  
38  
39  
40  
41  
42  
43  
44  
45  
46  
47  
48  
49  
50  
51  
52  
53  
54  
55  
56  
57  
58  
59  
60

69

70 **Word count (abstract): 283**

71 **Word count (text excluding references, tables, figure legends): 3422**

For peer review only

## 72 INTRODUCTION

73 The 2018 revision of World Urbanization Prospects reported that 55% of the world's  
74 population lived in urban settlements, and it is expected to increase to 68% by 2050.<sup>1</sup> A lion's  
75 share of the future growth of the world's urban population is expected to happen in developing  
76 nations.<sup>1</sup> In advanced economies, city dwellers normally enjoy better living conditions, better  
77 healthcare access, and more effective public-health interventions than their rural counterparts do.  
78 However, in developing countries, where urbanization is rapid and unplanned, it is more likely to  
79 pose a threat to public health through environmental degradation, unhealthy lifestyles, increased  
80 stress, and inadequate sanitation.<sup>2-5</sup>

81 China, the largest developing country in the world, has been undergoing urbanization at an  
82 unprecedented rate over the last three decades.<sup>1</sup> A small but growing body of literature has  
83 investigated the effect of urbanization on the Chinese population's health.<sup>6-15</sup> Most earlier studies  
84 used either a single indicator (e.g. urbanization rate) or a composite indicator derived from a set of  
85 neighbourhood characteristics (e.g. urbanicity index) to assess the level of urbanization and  
86 explore its relationship with individual health.<sup>6-11</sup> However, these studies have failed to recognise  
87 urbanization as a multi-faceted process involving population concentration, economic growth,  
88 land-use conversion, infrastructure upgrading, and lifestyle changes, and that different aspects of  
89 urbanization may have complex effects on residents' health.<sup>5 16-18</sup> For example, the healthy  
90 migrant hypothesis suggests that a massive inflow of migrants to cities may improve the overall  
91 level of residents' health.<sup>19</sup> On the other hand, "salmon bias" hypothesis implies that the unhealthy  
92 migrants who are retired or close to retirement age may return to their rural and small-town  
93 hometowns. A traditional Chinese aphorism is: "Fallen leaves return to the roots" implying  
94 reverting to one's origin. Economic growth and land use change in rapidly industrializing  
95 countries are normally accompanied by increased environmental pollution, which is detrimental to  
96 residents' health.<sup>2 3 12 20 21</sup> On the other hand, economic growth may lead to better access to health  
97 knowledge and services, which could improve residents' health.<sup>5</sup> Lifestyle changes associated  
98 with urbanization, such as less physical activity and more high-calorie food intake, may also affect  
99 residents' health.<sup>8 22 23</sup> Therefore, considering the effects of multiple dimensions of urbanization  
100 on residents' health could provide a complete picture of how urbanization affects individual  
101 health.

102 Another limitation of previous studies is that the extent to which the urbanization rate  
103 influences residents' health has been rarely examined. For example, a previous study investigated  
104 the effect of living in more urbanized areas on health at a given time-point (i.e. urbanicity) in the  
105 Chinese context.<sup>6 8</sup> However, highly urbanized areas do not necessarily experience rapid  
106 urbanization.<sup>4 5 24</sup> The rate of urbanization also affects residents' health, as a rapid urban growth is  
107 usually accompanied by environmental and behavioural transitions, such as environmental  
108 deterioration, increased stress, lifestyle change, changing population composition, and declining  
109 social cohesion.<sup>2 4 5 8 22 25</sup> Only a few studies have considered both the level and rate of  
110 urbanization simultaneously. For example, Chen et al.<sup>16</sup> investigated the effects of urbanization on  
111 health using multiple measures of urbanization dynamics including the level and rate of  
112 urbanization; however, their conclusion was drawn from the analysis of a small-scale survey  
113 conducted in 27 prefectures, which had the limitations of poor generalizability and homogeneous  
114 environmental settings.<sup>26 27</sup> Therefore, including the rate of urbanization in the analytical  
115 framework of urbanization-health relationships is essential.

1  
2  
3 116 Another research gap is the lack of investigation into the moderating effect of individual  
4 117 attributes on urbanization-health relationships. It is hypothesised that these relationships vary by  
5 118 education, as higher- and lower-educated people are likely to have different health practices and  
6 119 different levels of access to health services in large cities, whereas this educational gap is less  
7 120 pronounced in small towns and rural areas.<sup>28 29</sup> It is also hypothesised that higher- and  
8 121 low-educated people have differing propensities to migrate, and the effect of health selective  
9 122 migration varies by education level.<sup>30</sup> Furthermore, higher- and lower-educated people differ in  
10 123 their ability to adapt to stress arising from rapid urbanization and consequent social life changes.<sup>5</sup>  
11 124 <sup>22 31</sup> Therefore, the moderating effect of education on urbanization-health relationships among  
12 125 older people is worth exploring.

13  
14  
15  
16 126 This study aimed to investigate the association between urbanization and self-rated health of  
17 127 older adults using the 2005 China's 1% population sample survey and statistical data from  
18 128 statistical yearbooks. In particular, the study focused on how different dimensions of urbanization  
19 129 (population growth, land use change, economic growth, and health service improvement) are  
20 130 related to older people's health and how both the level and rate of urbanization are associated with  
21 131 their health. Further, it examined the moderating effect of education on the association between  
22 132 each of the four dimensions of urbanization and health. The study is significant in several respects.  
23 133 First, it considers the different dimensions of urbanization, thus capturing the complex association  
24 134 between urbanization and self-reported health of the older adults. Second, it provides an in-depth  
25 135 understanding of the urbanization-health relationship among older adults. Moreover, this study  
26 136 used nationally representative survey data covering 267 prefectures across 31 provinces, thus  
27 137 providing a more comprehensive picture of urbanization-health relationships across the country.

## 138 139 **METHODS**

### 140 **Data**

141 This study used individual micro-data from the 2005 China's 1% population sample survey  
142 (hereinafter, the 2005 survey). The 2005 survey was conducted by the National Bureau of  
143 Statistics of China using a stratified, cluster, and probability proportional to size (PPS) sampling.  
144 The survey team obtained written consents from each participant at the time of survey. We  
145 accessed the data with specific permission from the National Bureau of Statistics of China  
146 (<http://www.stats.gov.cn/>). The 2005 survey included 2.59 million individuals living in 340  
147 prefectures (including prefecture-level cities, prefectures in a narrow sense, leagues, and  
148 autonomous prefectures). Post-survey enumeration has indicated an undercount rate of 1.72%. We  
149 excluded individuals aged less than 60 years and further restricted the sample to those aged 60-79  
150 years, as those aged over 80 years had a higher risk of mortality. We excluded 3,701 (1.54% of the  
151 total) individuals aged 60-79 years who had any missing value in the outcome variable and  
152 covariates. The final dataset included 236,030 individuals from 267 prefecture-level cities. This  
153 study is exempt from ethical approval for the following reasons: first, the micro-data from the  
154 2005 survey did not contain any sensitive information; second, individuals who were involved in  
155 the survey were anonymous; third, access to the data was administered by a governmental  
156 organization that complied with various legal requirements about data protection.

### 157 158 **Patient and public involvement**

159 Patients or the public were not involved in this study.  
160

1  
2  
3 1604 161 **Measures**

## 5 162 Outcome

6 163 The outcome variable in this study was self-reported health (SRH), which was the only question in  
7 164 the 2005 survey pertaining to health. SRH is a sensitive and reliable indicator of the current health  
8 165 status of older people, which has been widely used in previous studies.<sup>32-34</sup> Respondents were  
9 166 asked to assess their overall health status over the past month based on a three-point scale (good,  
10 167 fair, or poor). To simplify the analysis, we recoded the variable into a binary variable: 0 for good  
11 168 health and 1 for fair or poor health.

12 169

## 13 170 Predictors

14 171 The key predictors used to measure prefectures' urbanization level and rate included four  
15 172 specific dimensions of urbanization (land-use conversion, economic growth, population  
16 173 concentration, and health services). The ratio of urban built-up areas to the entire area, the gross  
17 174 domestic product per capita, population density, and the number of hospital beds per thousand  
18 175 population were used to assess the level of rural-urban land-use conversion, economic growth,  
19 176 population concentration, and health services, respectively. Further, the rates of land-use  
20 177 conversion, economic growth, concentration of population, and improvement in health services  
21 178 were considered using the changes in the corresponding indicators from 2000 to 2005.

22 179

## 23 180 Covariates

24 181 We adjusted for individual-level covariates: gender, age, ethnicity, marital status, urbanicity  
25 182 of current residence, *hukou* status (governmental household registration system), education,  
26 183 having primary endowment insurance, having basic medical insurance, housing area per capita,  
27 184 housing construction time, and the provision of four types of housing facilities (water supply,  
28 185 kitchen, toilet and bathroom).

29 186

## 30 187 Analysis

31 188 Multilevel logistic regression was used to examine the association between SRH and the level  
32 189 and rate of urbanization. The models were initially fitted with covariates only. We then added  
33 190 predictors related to both the level and rate of urbanization. Thereafter, these models were  
34 191 sequentially adjusted for interaction terms between the level or the rate of urbanization on one  
35 192 hand and education on the other. We performed a variance inflation factor test and found no  
36 193 multicollinearity among the variables. All analyses were conducted using STATA 14.0.

37 194

38 195 **RESULTS**

39 196 The descriptive analysis of the variables is presented in Table 1. Of all the respondents,  
40 197 66.19% reported good health, 22.73% reported fair health, and 11.08% reported poor health.  
41 198 62.12% of respondents were aged between 60 and 69. Respondents were more representative of  
42 199 ethnic majority (Han Chinese), not married, local agricultural *hukou*, and individuals with low  
43 200 education (junior high school or below). Only 25% had primary endowment insurance scheme,  
44 201 and about 40% had basic medical insurance scheme. About 50% of the respondents lived in rural  
45 202 areas. The average housing area per capita was 32.57 square meters. About 77% lived in houses  
46 203 constructed after 1978, and 30% in houses with less than two types of facilities.



204

205

**Table 1** Summary statistics of variables

|                                                                                     | Whole sample<br>(n=236,030) | Reported good health<br>(n=156,222) | Reported fair or poor health<br>(n=79,808) |
|-------------------------------------------------------------------------------------|-----------------------------|-------------------------------------|--------------------------------------------|
| Self-reported health (%)                                                            |                             |                                     |                                            |
| Good                                                                                | 66.19                       |                                     |                                            |
| Fair or poor                                                                        | 33.81                       |                                     |                                            |
| Predictors (prefecture-level variables)                                             |                             |                                     |                                            |
| Land-use conversion in 2005 (%)                                                     | 1.95 (3.48)                 | 2.06 (3.65)                         | 1.76 (3.13)                                |
| GDP per capita in 2005 (10,000 Yuan)                                                | 1.87 (1.49)                 | 1.91 (1.53)                         | 1.77 (1.40)                                |
| Population density in 2005 (population per km <sup>2</sup> )                        | 548.98 (443.51)             | 562.51 (449.37)                     | 522.51 (430.58)                            |
| The number of hospital beds per thousand population in 2005 (bed)                   | 2.93 (1.53)                 | 2.96 (1.55)                         | 2.88 (1.49)                                |
| The change in land-use conversion from 2000 to 2005 (%)                             | 59.10 (88.93)               | 60.70 (92.26)                       | 55.98 (81.92)                              |
| The change in GDP per capita from 2000 to 2005 (%)                                  | 87.47 (41.19)               | 87.39 (41.90)                       | 87.63 (39.77)                              |
| The change in population density from 2000 to 2005 (%)                              | 3.40 (11.88)                | 3.59 (13.11)                        | 3.02 (8.97)                                |
| The change in number of hospital beds per thousand population from 2000 to 2005 (%) | 5.21 (13.46)                | 5.42 (13.44)                        | 4.80 (13.48)                               |
| Gender (%)                                                                          |                             |                                     |                                            |
| Female                                                                              | 48.74                       | 45.96                               | 54.18                                      |
| Male                                                                                | 51.26                       | 54.04                               | 45.82                                      |
| Age (years) (%)                                                                     |                             |                                     |                                            |
| 60-64                                                                               | 33.64                       | 41.11                               | 19.02                                      |
| 65-69                                                                               | 28.49                       | 29.86                               | 25.80                                      |
| 70-74                                                                               | 23.09                       | 19.18                               | 30.76                                      |
| 75-79                                                                               | 14.78                       | 9.85                                | 24.42                                      |
| Ethnicity (%)                                                                       |                             |                                     |                                            |
| Han Chinese                                                                         | 96.49                       | 96.70                               | 96.08                                      |
| Minority                                                                            | 3.51                        | 3.30                                | 3.92                                       |
| Marital status (%)                                                                  |                             |                                     |                                            |
| Single, divorced, or widowed                                                        | 75.34                       | 79.77                               | 66.67                                      |
| Married                                                                             | 24.66                       | 20.23                               | 33.33                                      |
| <i>Hukou</i> status (%)                                                             |                             |                                     |                                            |
| Local agricultural                                                                  | 63.77                       | 60.35                               | 70.48                                      |
| Local non-agricultural                                                              | 28.68                       | 31.13                               | 23.87                                      |
| Non-local agricultural                                                              | 2.37                        | 2.59                                | 1.93                                       |
| Non-local non-agricultural                                                          | 5.18                        | 5.93                                | 3.72                                       |
| Education (%)                                                                       |                             |                                     |                                            |
| No schooling                                                                        | 34.73                       | 28.09                               | 47.72                                      |
| Elementary school or junior high school                                             | 55.04                       | 59.58                               | 46.14                                      |
| Senior high school                                                                  | 6.12                        | 7.32                                | 3.78                                       |
| College or above                                                                    | 4.11                        | 5.01                                | 2.36                                       |
| Primary endowment insurance (%)                                                     |                             |                                     |                                            |
| Had                                                                                 | 24.68                       | 27.55                               | 19.05                                      |

|                                           |               |               |               |
|-------------------------------------------|---------------|---------------|---------------|
| Did not have                              | 75.32         | 72.45         | 80.95         |
| Basic Medical insurance (%)               |               |               |               |
| Had                                       | 41.44         | 43.67         | 37.07         |
| Did not have                              | 58.56         | 56.33         | 62.93         |
| Urbanicity of current residence (%)       |               |               |               |
| Rural areas                               | 52.20         | 48.92         | 58.61         |
| Urban areas: towns                        | 14.87         | 15.47         | 13.69         |
| Urban areas: cities                       | 32.93         | 35.61         | 27.70         |
| Housing area per capita (m <sup>2</sup> ) | 32.57 (25.98) | 32.76 (25.81) | 32.21 (26.30) |
| Housing construction time (%)             |               |               |               |
| Before 1978                               | 22.62         | 20.63         | 26.52         |
| After 1978                                | 77.38         | 79.37         | 73.48         |
| Housing facilities (%)                    |               |               |               |
| None, one or two types of facilities      | 45.64         | 42.92         | 50.97         |
| Three types of facilities                 | 24.84         | 24.04         | 26.41         |
| Four types of facilities                  | 29.52         | 33.04         | 22.62         |

206 Note: results are presented as proportion for categorical variables and as mean (standard errors) for continuous variables. GDP Gross  
207 Domestic Product

208

209 Table 2 presents the results of the multilevel logistic regression. Model 1 includes covariates  
210 only. Older people who were female, of advanced age, not married, and less-educated were more  
211 likely to report fair or poor health than were their male, younger, married, and more-educated  
212 counterparts. Local and agricultural *hukou* holders were more likely to report fair or poor health  
213 than were their non-local and non-agricultural counterparts. Primary endowment insurance  
214 recipients and urban residents were less likely to report fair or poor health than were  
215 non-recipients and rural residents. Moreover, older people who lived in larger, more recently  
216 constructed and better-equipped houses were less likely to report fair or poor health than those  
217 living in smaller, older, and less-equipped houses.

218

219 **Table 2** Multilevel logistic regression estimates of reporting fair or poor health

| Effects and Variables                                                           | Model 1                | Model 2                |
|---------------------------------------------------------------------------------|------------------------|------------------------|
|                                                                                 | OR (95% CI)            | OR (95% CI)            |
| Fixed part                                                                      |                        |                        |
| Land-use conversion in 2005                                                     |                        | 0.99 (0.97 - 1.01)     |
| The change in land-use conversion from 2000 to 2005                             |                        | 0.96 (0.90 - 1.02)     |
| The logarithm GDP per capita in 2005                                            |                        | 0.91 (0.81 - 1.01)     |
| The change in GDP per capita from 2000 to 2005                                  |                        | 0.94 (0.85 - 1.05)     |
| The logarithm population density in 2005                                        |                        | 0.93 (0.87 - 0.99) *   |
| The change in population density from 2000 to 2005                              |                        | 0.74 (0.59 - 0.93) **  |
| The number of hospital beds per thousand population in 2005                     |                        | 1.12 (1.06 - 1.19) *** |
| The change in number of hospital beds per thousand population from 2000 to 2005 |                        | 0.91 (0.67 - 1.25)     |
| Females (ref: males)                                                            | 1.16 (1.14 - 1.19) *** | 1.16 (1.14 - 1.19) *** |
| Age (ref: 60-64)                                                                |                        |                        |
| 65-69                                                                           | 1.81 (1.77 - 1.86) *** | 1.81 (1.77 - 1.86) *** |

1  
2  
3  
4  
5  
6  
7  
8  
9  
10  
11  
12  
13  
14  
15  
16  
17  
18  
19  
20  
21  
22  
23  
24  
25  
26  
27  
28  
29  
30  
31  
32  
33  
34  
35  
36  
37  
38  
39  
40  
41  
42  
43  
44  
45  
46  
47  
48  
49  
50  
51  
52  
53  
54  
55  
56  
57  
58  
59  
60

|                                                         |                           |                           |
|---------------------------------------------------------|---------------------------|---------------------------|
| 70-74                                                   | 3.19 (3.10 - 3.27) ***    | 3.19 (3.11 - 3.27) ***    |
| 75-79                                                   | 4.66 (4.53 - 4.80) ***    | 4.67 (4.53 - 4.81) ***    |
| Minority (ref: Han Chinese)                             | 1.05 (1.00 - 1.11)        | 1.05 (0.99 - 1.10)        |
| Single, divorced, or widowed (ref: married)             | 1.30 (1.28 - 1.33) ***    | 1.30 (1.28 - 1.33) ***    |
| <i>Hukou</i> status (ref: local agricultural)           |                           |                           |
| Local non-agricultural                                  | 0.92 (0.89 - 0.95) ***    | 0.91 (0.88 - 0.94) ***    |
| Non-local agricultural                                  | 0.73 (0.69 - 0.78) ***    | 0.73 (0.69 - 0.78) ***    |
| Non-local non-agricultural                              | 0.83 (0.78 - 0.87) ***    | 0.82 (0.78 - 0.87) ***    |
| Education (ref: no schooling)                           |                           |                           |
| Elementary school or junior high school                 | 0.68 (0.67 - 0.70) ***    | 0.68 (0.67 - 0.70) ***    |
| Senior high school                                      | 0.60 (0.57 - 0.63) ***    | 0.60 (0.57 - 0.63) ***    |
| College or above                                        | 0.55 (0.52 - 0.58) ***    | 0.55 (0.52 - 0.58) ***    |
| Had primary endowment insurance (ref: did not have)     | 0.88 (0.85 - 0.91) ***    | 0.88 (0.85 - 0.91) ***    |
| Had Basic Medical insurance (ref: did not have)         | 0.98 (0.95 - 1.00)        | 0.98 (0.95 - 1.00)        |
| Urbanicity of current residence (ref: rural areas)      |                           |                           |
| Urban areas: towns                                      | 0.87 (0.84 - 0.89) ***    | 0.87 (0.84 - 0.89) ***    |
| Urban areas: cities                                     | 0.87 (0.84 - 0.90) ***    | 0.87 (0.84 - 0.89) ***    |
| Housing area per capita (m <sup>2</sup> )               | 0.998 (0.997 - 0.999) *** | 0.998 (0.997 - 0.999) *** |
| Housing construction time after 1978 (ref: before 1978) | 0.88 (0.86 - 0.90) ***    | 0.88 (0.86 - 0.90) ***    |
| Housing facilities (ref: none, one and two)             |                           |                           |
| Three                                                   | 0.99 (0.96 - 1.01)        | 0.99 (0.96 - 1.01)        |
| Four                                                    | 0.82 (0.80 - 0.85) ***    | 0.83 (0.80 - 0.85) ***    |
| Var (city-level constant)                               | 0.14***                   | 0.11***                   |
| Log likelihood                                          | -135659.94                | -135632.03                |
| AIC                                                     | 271363.90                 | 271324.10                 |
| ICC                                                     | 0.04                      | 0.03                      |

Note: OR: odds ratio; 95% confidence intervals in brackets; \* p<0.05, \*\* p<0.01, \*\*\* p<0.001.

221

222 The results of Model 2 show that the level and rate of population concentration were  
 223 negatively associated with the odds of reporting fair or poor health (OR=0.93 (95%CI 0.87 to  
 224 0.99) and 0.74 (95%CI 0.59 to 0.93) respectively), while the level of health services was  
 225 positively correlated with the odds of reporting fair or poor health (OR=1.12, 95%CI 1.06 to 1.19).  
 226 There was no significant relationship between the odds of reporting fair or poor health and the  
 227 level of land use conversion, economic growth (land use conversion: OR=0.99, 95%CI 0.97 to  
 228 1.01; economic growth: OR= 0.91, 95%CI 0.81 to 1.01). Similarly, no significant relationship was  
 229 observed between the odds of reporting fair or poor health and land use conversion rate, economic  
 230 growth rate, and health service improvement (land use conversion rate: OR=0.96, 95%CI 0.90 to  
 231 1.02; economic growth rate: OR=0.94, 95%CI 0.85 to 1.05; health service improvement:  
 232 OR=0.91, 95%CI 0.67 to 1.25).

233 The results of the moderating effect of education on the association between the level of  
 234 urbanization and SRH are shown in Table 3. The level of land use conversion was negatively  
 235 associated with the SRH of the least educated (OR=0.98, 95%CI 0.96 to 1.00) and positively  
 236 associated with the odds of those who had completed primary education reporting fair or poor  
 237 health (OR=1.02, 95%CI 1.02 to 1.03; OR=1.04, 95%CI 1.03 to 1.05; and OR=1.03, 95%CI 1.02

238 to 1.05) (Model 3). The level of economic growth was not significantly associated with the SRH of the least educated (OR=0.95, 95%CI 0.88 to 1.02) and was  
 239 positively associated with that of other educational groups (OR=1.08, 95%CI 1.05 to 1.12; OR=1.19, 95%CI 1.11 to 1.26; and OR=1.14, 95%CI 1.05 to 1.24) (Model  
 240 4). The level of population concentration was negatively correlated with the odds of reporting fair or poor health across all educational groups, and the strength of the  
 241 negative relationship decreased with higher level of education (OR=0.84, 95%CI 0.79 to 0.89; OR=1.08, 95%CI 1.05 to 1.10; OR=1.19, 95%CI 1.13 to 1.26; and  
 242 OR=1.19, 95%CI 1.11 to 1.28) (Model 5). The level of health services was positively correlated with the odds of reporting fair or poor health across all educational  
 243 groups with the strongest positive relationship found in senior high school (OR=1.05, 95%CI 1.01 to 1.09; OR=1.04, 95%CI 1.02 to 1.05; OR=1.07, 95%CI 1.04 to  
 244 1.10; and OR=1.04, 95%CI 1.00 to 1.07) (Model 6).  
 245  
 246

**Table 3** The relationship between the level of urbanization and the odds of reporting fair or poor health moderated by education

| Variables                                                         | Model 3 (IV: land-use conversion) | Model 4 (IV: logarithm GDP per capita) | Model 5 (IV: logarithm population density) | Model 6 (IV: health institutional beds per 1000 population) |
|-------------------------------------------------------------------|-----------------------------------|----------------------------------------|--------------------------------------------|-------------------------------------------------------------|
|                                                                   | OR (95% CI)                       | OR (95% CI)                            | OR (95% CI)                                | OR (95% CI)                                                 |
| The level of urbanization in 2005                                 | 0.98 (0.96 - 1.00) *              | 0.95 (0.88 - 1.02)                     | 0.84 (0.79 - 0.89) ***                     | 1.05 (1.01 - 1.09) *                                        |
| The rate of urbanization from 2000 to 2005                        | 0.92 (0.87 - 0.98) *              | 0.98 (0.88 - 1.08)                     | 0.73 (0.58 - 0.92) **                      | 0.79 (0.58 - 1.08)                                          |
| Education (ref: no schooling)                                     |                                   |                                        |                                            |                                                             |
| Elementary school or junior high school                           | 0.69 (0.67 - 0.70) ***            | 0.69 (0.67 - 0.70) ***                 | 0.69 (0.67 - 0.70) ***                     | 0.69 (0.67 - 0.70) ***                                      |
| Senior high school                                                | 0.59 (0.56 - 0.62) ***            | 0.59 (0.56 - 0.62) ***                 | 0.59 (0.56 - 0.62) ***                     | 0.59 (0.55 - 0.62) ***                                      |
| College or above                                                  | 0.53 (0.50 - 0.57) ***            | 0.54 (0.50 - 0.58) ***                 | 0.53 (0.50 - 0.57) ***                     | 0.55 (0.51 - 0.59) ***                                      |
| The level of urbanization * education (ref: level * no schooling) |                                   |                                        |                                            |                                                             |
| Level * elementary school or junior high school                   | 1.02 (1.02 - 1.03) ***            | 1.08 (1.05 - 1.12) ***                 | 1.08 (1.05 - 1.10) ***                     | 1.04 (1.02 - 1.05) ***                                      |
| Level * senior high school                                        | 1.04 (1.03 - 1.05) ***            | 1.19 (1.11 - 1.26) ***                 | 1.19 (1.13 - 1.26) ***                     | 1.07 (1.04 - 1.10) ***                                      |
| Level * college or above                                          | 1.03 (1.02 - 1.05) ***            | 1.14 (1.05 - 1.24) **                  | 1.19 (1.11 - 1.28) ***                     | 1.04 (1.00 - 1.07) *                                        |

Note: OR: odds ratio; 95% confidence intervals in brackets; \* p<0.05, \*\* p<0.01, \*\*\* p<0.001. All models have been adjusted for individual covariates shown in Table 2.

247  
 248  
 249 Table 4 presents the results of the moderating effect of education in the association between the rate of urbanization and SRH. The rate of land-use conversion

1  
2  
3  
4  
5  
6  
7  
8  
9  
10  
11  
12  
13  
14  
15  
16  
17  
18  
19  
20  
21  
22  
23  
24  
25  
26  
27  
28  
29  
30  
31  
32  
33  
34  
35  
36  
37  
38  
39  
40  
41  
42  
43  
44  
45  
46

250 was negatively correlated with the SRH of the least educated (OR=0.92, 95%CI 0.86 to 0.98) and not significantly associated with the odds of those who had  
 251 completed primary education reporting fair or poor health (OR=1.01, 95%CI 0.99 to 1.04; OR=1.04, 95%CI 0.99 to 1.10; and OR=1.06, 95%CI 1.00 to 1.13) (Model  
 252 7). Economic growth rate was negatively correlated with the odds of those who had education of junior high school or below reporting fair or poor health (OR=0.95,  
 253 95%CI 0.91 to 1.00) and not significantly correlated with other educational groups' SRH (OR=1.00, 95%CI 0.90 to 1.12; OR=0.94, 95%CI 0.84 to 1.05; and  
 254 OR=0.96, 95%CI 0.84 to 1.10) (Model 8). The rate of population concentration was negatively associated with the odds of those without schooling reporting fair or  
 255 poor health (OR=0.73, 95%CI 0.56 to 0.94) and not significantly associated with that of those who had senior high school education (OR=0.99, 95%CI 0.81 to 1.22;  
 256 OR=1.48, 95%CI 0.97 to 2.24; and OR=0.89, 95%CI 0.52 to 1.51) (Model 9). The rate of health service improvement was positively correlated with the SRH of the  
 257 most educated (OR=1.88, 95%CI 1.21 to 2.94) (Model 10).

258

259

**Table 4** The relationship between the rate of urbanization and the odds of reporting fair or poor health moderated by education

| Variables                                                         | Model 7 (IV: land-use conversion) | Model 8 (IV: logarithm GDP per capita) | Model 9 (IV: logarithm population density) | Model 10 (IV: health institutional beds per 1000 population) |
|-------------------------------------------------------------------|-----------------------------------|----------------------------------------|--------------------------------------------|--------------------------------------------------------------|
|                                                                   | OR (95% CI)                       | OR (95% CI)                            | OR (95% CI)                                | OR (95% CI)                                                  |
| The level of urbanization in 2005                                 | 1.00 (0.98 - 1.02)                | 1.00 (0.93 - 1.07)                     | 0.88 (0.83 - 0.93) ***                     | 1.07 (1.04 - 1.11) ***                                       |
| The rate of urbanization from 2000 to 2005                        | 0.92 (0.86 - 0.98) **             | 1.00 (0.90 - 1.12)                     | 0.73 (0.56 - 0.94) *                       | 0.79 (0.57 - 1.09)                                           |
| Education (ref: no schooling)                                     |                                   |                                        |                                            |                                                              |
| Elementary school or junior high school                           | 0.68 (0.67 - 0.70) ***            | 0.68 (0.67 - 0.70) ***                 | 0.68 (0.67 - 0.70) ***                     | 0.68 (0.67 - 0.70) ***                                       |
| Senior high school                                                | 0.60 (0.57 - 0.63) ***            | 0.60 (0.57 - 0.63) ***                 | 0.60 (0.57 - 0.63) ***                     | 0.60 (0.57 - 0.63) ***                                       |
| College or above                                                  | 0.55 (0.52 - 0.58) ***            | 0.55 (0.52 - 0.58) ***                 | 0.55 (0.52 - 0.58) ***                     | 0.55 (0.52 - 0.58) ***                                       |
| The speed of urbanization * education (ref: speed * no schooling) |                                   |                                        |                                            |                                                              |
| Rate * elementary school or junior high school                    | 1.01 (0.99 - 1.04)                | 0.95 (0.91 - 1.00) *                   | 0.99 (0.81 - 1.22)                         | 0.98 (0.85 - 1.13)                                           |
| Rate * senior high school                                         | 1.04 (0.99 - 1.10)                | 0.94 (0.84 - 1.05)                     | 1.48 (0.97 - 2.24)                         | 1.03 (0.72 - 1.46)                                           |
| Rate * college or above                                           | 1.06 (1.00 - 1.13)                | 0.96 (0.84 - 1.10)                     | 0.89 (0.52 - 1.51)                         | 1.88 (1.21 - 2.94) **                                        |

260

Note: OR odds ratio; 95% confidence intervals in brackets; \* p<0.05, \*\* p<0.01, \*\*\* p<0.001. All models have been adjusted for individual covariates shown in Table 2.

1  
2  
3 261 **DISCUSSION**

4 262 This study is the first study to examine the association between the multiple dimensions of  
5 263 urbanization and SRH among older adults using nationally-representative survey data covering  
6 264 most of the prefectures in China. In contrast to previous studies examining urban health penalty in  
7 265 Chinese people across all ages,<sup>6-8 16</sup> our findings show that living in more densely-populated areas  
8 266 and areas undergoing rapid population concentration decreases older people's odds of reporting  
9 267 fair or poor health. Fast-growing and densely populated cities draw numerous healthy and  
10 268 working-aged migrants from rural and small-town areas,<sup>35 36</sup> and most of these migrants still  
11 269 perceive themselves to be healthy when they cross the age of 60 years (healthy migration  
12 270 phenomenon)<sup>19</sup>. On the other hand, as per traditional Chinese culture, people revert to their origin  
13 271 when they are old; migrants who perceive themselves to be unhealthy are likely to return to their  
14 272 rural and small-town hometowns when they retire or are close to retirement age ("salmon bias"  
15 273 phenomenon)<sup>30</sup>. Additionally, unhealthy older migrants would go back to their hometowns to  
16 274 avoid high healthcare expenditure in urban areas. The health selective migration partially accounts  
17 275 for the positive association between population concentration and SRH.

18 276 Earlier studies have attributed urban health penalty in China to changes in health behaviours  
19 277 associated with urbanization.<sup>7 8 16</sup> Specifically, people living in more urbanized areas are more  
20 278 likely to have unhealthy lifestyles, such as insufficient physical activity and high-fat and  
21 279 high-calorie intake.<sup>7 8 16</sup> Nevertheless, our study found no evidence that economic growth and  
22 280 population concentration may have a detrimental effect on people's SRH. This suggests that the  
23 281 pathway of lifestyle is less pronounced for older people than for the working-age population in  
24 282 China, as many older people living in well-developed and densely populated areas still maintain  
25 283 their existing healthy lifestyle (i.e., more physical activities and less high-fat and high-calorie  
26 284 intake) that was established many years ago (when China was a less developed and isolated  
27 285 country). Another pathway of urban health penalty involves environmental pollution and decrease  
28 286 in cultivated land.<sup>2 8 12</sup> However, our results show no relationship between land use conversion and  
29 287 economic growth on the one hand and older people's SRH on the other, which suggests that  
30 288 environmental pollution and decrease in cultivated land might play little role in the association  
31 289 between urbanization and older people's SRH.

32 290 Urbanization may also positively affect people's health through improved healthcare services  
33 291 and quality of life.<sup>5</sup> These pathways are associated with two dimensions of urbanization, economic  
34 292 growth and health service improvements, which are found to be either non-significantly or  
35 293 counter-intuitively positively related to older people's odds of reporting fair or poor health.  
36 294 Economic growth was not accompanied by an increase in older people's odds of reporting fair or  
37 295 poor health, probably because health benefits as a result of economic growth might be offset by  
38 296 associated detrimental effects such as environmental deterioration, increased stress, and weakened  
39 297 social bonds. Surprisingly, the level of health services was positively associated with the odds of  
40 298 older people reporting fair or poor health, and health service improvement was not linked to an  
41 299 increase in older people's odds of reporting fair or poor health. One possible explanation for this  
42 300 finding is that older people living in areas with better health services are more likely to receive  
43 301 health knowledge and be aware of their trivial illnesses, and thus, may report themselves as  
44 302 unhealthy.

45 303 Education had a moderating effect on the association between each of the four dimensions of  
46 304 urbanization and older people's SRH. Land use conversion was negatively associated with the

1  
2  
3 305 odds of the least educated individuals reporting fair or poor health. One explanation is that older  
4 306 people without education are indigenous peasants living in their home villages. Those living in  
5 307 areas with a high proportion of urban land and areas that undergo rapid land use conversion  
6 308 usually have a better economic well-being and quality of life than do their less-urbanized  
7 309 counterparts, and thus report a better health status. The effects of land use conversion and  
8 310 economic growth on older people's SRH are more detrimental to those who are more educated,  
9 311 probably because health behaviours differ greatly between those who are more educated and those  
10 312 who are less educated in economically developed areas.<sup>7 37</sup> People with a higher level of education  
11 313 are more likely to consume more food than needed and adopt a new lifestyle than do less-educated  
12 314 people. Moreover, high-fat and high-calorie diets and sedentary behaviour are more prevalent in  
13 315 economically developed areas. By contrast, the educational gap in health behaviours is less  
14 316 pronounced in less-developed areas, as educated people in these areas do not have an unhealthy  
15 317 diet and sedentary behaviour.<sup>7</sup> The negative effect of population concentration on older people's  
16 318 likelihood of reporting fair or poor health was stronger for the less-educated than for the  
17 319 more-educated, probably because in the Chinese context, the effect of health-selective migration is  
18 320 stronger for less-educated people who are often manual labourers and whose employment  
19 321 opportunities rely on their physical health conditions. The relationship between the level of health  
20 322 service and fair or poor SRH was positive; the rate of health service improvement was positively  
21 323 correlated with fair or poor SRH for the most educated individuals. This suggests that they tend to  
22 324 have stronger health awareness and higher expectations regarding their health when already living  
23 325 in areas with a high level of health services.

24 326 This study has some limitations. First, we were unable to capture the causal effect of changes  
25 327 in urbanization over time on older peoples' health outcomes due to the cross-sectional nature of  
26 328 the data. Second, our estimates of the effect of urbanization on health might be subject to  
27 329 self-selection bias, as older people with certain observed or unobserved characteristics (e.g. having  
28 330 well-educated parents) are more likely to live in more urbanized areas and report better health than  
29 331 are those who do not have those characteristics. Given that the middle-aged and older people in  
30 332 China have a low migration rate, we can assume that self-selection bias is not a severe issue for  
31 333 the present study. Third, we did not explore the pathways (e.g. health behaviours, the use of  
32 334 health-care facilities and services, and social capital) through which urbanization affects SRH due  
33 335 to the lack of relevant information in our dataset.

34 336 In conclusion, the results show that the odds of older people reporting fair or poor health is  
35 337 negatively correlated with the level and rate of population concentration and is positively  
36 338 correlated with the level of health services. These findings support the healthy migration and  
37 339 "salmon bias" hypotheses. Education had a moderating effect on the association between each of  
38 340 the four dimensions of urbanization and older people's SRH. The possible explanations for the  
39 341 difference between more educated and less educated older people in terms of urbanization-health  
40 342 relationships include health-selective migration, differing quality of life, differing health  
41 343 behaviours, and varying health expectations. Public efforts such as the equitable distribution of  
42 344 health services and the elimination of social exclusion of migrants should be made to decrease  
43 345 health inequalities among older people in China.

44 346  
45 347  
46 348  
47  
48  
49  
50  
51  
52  
53  
54  
55  
56  
57  
58  
59  
60

1  
2  
3 349 **Acknowledgments** Data used in this paper is derived from the 2005 China's one per cent  
4 350 population sample survey by the National Bureau of Statistics of China. The authors appreciate  
5 351 the assistance in providing data by the institutes and individuals aforementioned. The views  
6 352 expressed herein are the authors.  
7  
8 353

9  
10 354 **Contributors** YL, BH, ZF and ZL conceived the research question and designed the study. BH  
11 355 and RW performed statistical analysis. YL and BH drafted the manuscript, all authors contributed  
12 356 to the subsequent revisions of the manuscript, and approved the final version of the submitted  
13 357 manuscript.  
14  
15 358

16 359 **Funding** This research was funded by the National Natural Science Foundation of China (No.  
17 360 41871140, No. 41771167), Innovative Research and Development Team Introduction Program of  
18 361 Guangdong Province (No. 2017ZT07X355) and Guangzhou Science & Technology Project  
19 362 Applied Basic Research Programs (20183700042050443) supported this research.  
20  
21 363

22  
23 364 **Competing interests** None declared.  
24  
25 365

26 366 **Data sharing statement** No data are available  
27  
28 367  
29 368  
30 369  
31 370  
32 371  
33 372  
34 373  
35 374  
36 375  
37 376  
38 377  
39 378  
40 379  
41 380  
42 381  
43 382  
44 383  
45 384  
46 385  
47 386  
48 387  
49 388  
50 389  
51 390  
52 391  
53 392  
54  
55  
56  
57  
58  
59  
60



393 **REFERENCES**

- 394 1 United Nations, Department of Economic and Social Affairs, Population Division. The 2018 revision of  
395 the world urbanization prospects; 2018. [https://population.un.org/wup/Publications/Files/WUP2018-PressR](https://population.un.org/wup/Publications/Files/WUP2018-PressRelease.pdf)  
396 [elease.pdf](https://population.un.org/wup/Publications/Files/WUP2018-PressRelease.pdf) (accessed 15 Oct 2018).
- 397 2 Gong P, Liang S, Carlton EJ, et al. Urbanisation and health in China. *The Lancet* 2012;379(9818):843-852.
- 398 3 Moore M, Gould P, Keary BS. Global urbanization and impact on health. *Int J Hyg Envir Heal*  
399 2003;206(4-5):269-278.
- 400 4 Vlahov D, Freudenberg N, Proietti F, et al. Urban as a determinant of health. *J Urban Health* 2007;84(1):16-26.
- 401 5 Vlahov D, Galea S. Urbanization, urbanicity, and health. *J Urban Health* 2002;79(Suppl 1):S1-S12.
- 402 6 Chen H, Liu Y, Li Z, et al. Urbanization, economic development and health: evidence from China's labor-force  
403 dynamic survey. *Int J Equity Health* 2017;16(1):207-214.
- 404 7 Miao J, Wu X. Urbanization, socioeconomic status and health disparity in China. *Health Place* 2016;42:87-95.
- 405 8 Van de Poel E, O'Donnell O, Van Doorslaer E. Is there a health penalty of China's rapid urbanization? *Health*  
406 *Econ* 2012;21(4):367-385.
- 407 9 Van de Poel E, O'Donnell O, Van Doorslaer E. Urbanization and the spread of diseases of affluence in China.  
408 *Econ Hum Biol* 2009;7(2):200-216.
- 409 10 Jones-Smith JC, Popkin BM. Understanding community context and adult health changes in China:  
410 development of an urbanicity scale. *Soc Sci Med* 2010;71(8):1436-1446.
- 411 11 Thompson AL, Houck KM, Adair L, et al. Multilevel examination of the association of urbanization with  
412 inflammation in Chinese adults. *Health Place* 2014;28:177-186.
- 413 12 Li X, Song J, Lin T, et al. Urbanization and health in China, thinking at the national, local and individual levels.  
414 *Environ Health-Glob* 2016;15:113-123.
- 415 13 Li X, Wang C, Zhang G, et al. Urbanisation and human health in China: spatial features and a systemic  
416 perspective. *Environ Sci Pollut R* 2012;19(5):1375-1384.
- 417 14 Wang R, Xue D, Liu Y, et al. The relationship between urbanization and depression in China: the mediating  
418 role of neighborhood social capital. *Int J Equity Health* 2018;17:105-114.
- 419 15 Sun R, Gu D. Air pollution, economic development of communities, and health status among the elderly in  
420 urban China. *Am J Epidemiol* 2008;168(11):1311-1318.
- 421 16 Chen J, Chen S, Landry PF, et al. How dynamics of urbanization affect physical and mental health in urban  
422 China. *China Quart* 2014;220:988-1011.
- 423 17 Chen H, Liu Y, Zhu Z, et al. Does where you live matter to your health? Investigating factors that influence the  
424 self-rated health of urban and rural Chinese residents: evidence drawn from Chinese General Social Survey  
425 data. *Health Qual Life Out* 2017;15(1):78-88.
- 426 18 Villanueva K, Pereira G, Knuiman M, et al. The impact of the built environment on health across the life  
427 course: design of a cross-sectional data linkage study. *BMJ Open* 2013;3:e002482.
- 428 19 Abraído-Lanza AF, Dohrenwend BP, Ng-Mak DS, et al. The Latino mortality paradox: a test of the "salmon  
429 bias" and healthy migrant hypotheses. *Am J Public Health* 1999;89(10):1543-1548.
- 430 20 Wang R, Liu Y, Xue D, et al. Cross-sectional associations between long-term exposure to particulate matter and  
431 depression in China: The mediating effects of sunlight, physical activity, and neighborly reciprocity. *J Affect*  
432 *Disord* 2019; 249: 8-14.
- 433 21 Wang R, Xue D, Liu Y, et al. The relationship between air pollution and depression in China: Is neighbourhood  
434 social capital protective? *Int J Environ Res Public Health* 2018; 15(6): 1160-1173.
- 435 22 Harpham T. Urbanization and mental health in developing countries: a research role for social scientists, public  
436 health professionals and social psychiatrists. *Soc Sci Med* 1994;39(2):233-245.

- 1  
2  
3 437 23 Abuladze L, Kunder N, Lang K, et al. Associations between self-rated health and health behaviour among older  
4 438 adults in Estonia: a cross-sectional analysis. *BMJ Open* 2017;7:e013257.
- 6 439 24 Ng SW, Norton EC, Popkin BM. Why have physical activity levels declined among Chinese adults? Findings  
7 440 from the 1991-2006 China health and nutrition surveys. *Soc Sci Med* 2009;68(7):1305-1314.
- 8 441 25 Chen M, Zhang H, Liu W, et al. The global pattern of urbanization and economic growth: evidence from the  
9 442 last three decades. *Plos One* 2014;9(8):e103799.
- 11 443 26 Xu Z, Ouyang A. The factors influencing China's population distribution and spatial heterogeneity: a  
12 444 prefectural-level analysis using geographically weighted regression. *Appl Spat Anal Polic* 2018;11(3):465-480.
- 14 445 27 Xiang H, Yang J, Zhang T, et al. Analyzing in-migrants and out-migrants in urban China. *Appl Spat Anal Polic*  
15 446 2018;11(1):81-102.
- 16 447 28 Mackenbach JP, Irina S, Roskam AJR, et al. Socioeconomic inequalities in health in 22 European countries.  
17 448 *New Engl J Med* 2008;358(23):2468-2481.
- 19 449 29 Ross CE, Mirowsky J. Refining the association between education and health: the effects of quantity,  
20 450 credential, and selectivity. *Demography* 1999;36(4):445-460.
- 21 451 30 Norman P, Boyle P, Rees P. Selective migration, health and deprivation: a longitudinal analysis. *Soc Sci Med*  
22 452 2005;60(12):2755-2771.
- 24 453 31 Feng Z, Phillips DR, Jones K. A geographical multivariable multilevel analysis of social exclusion among older  
25 454 people in China: evidence from the China Longitudinal Aging Social Survey ageing study. *The Geographical*  
26 455 *Journal* 2018;184(4):413-428.
- 28 456 32 Feng Z, Wang WW, Jones K. A multilevel analysis of the role of the family and the state in self-rated health of  
29 457 elderly Chinese. *Health Place* 2013;23:148-156.
- 30 458 33 Wu Z, Schimmele CM. Psychological disposition and self-reported health among the 'oldest-old' in China.  
31 459 *Ageing Soc* 2006;26(1):135-151.
- 33 460 34 Lima-Costa MF, Cesar CC, Chor D, et al. Self-rated health compared with objectively measured health status as  
34 461 a tool for mortality risk screening in older adults: 10-year follow-up of the Bambuí Cohort Study of Aging.  
35 462 *AM J Epidemiol* 2012;175(3):228-235.
- 37 463 35 Liu Y, Xu W. Destination choices of permanent and temporary migrants in China, 1985-2005. *Popul Space*  
38 464 *Place* 2017; 23(1):1-17.
- 39 465 36 Liu Y, Shen J. Modeling skilled and less-skilled interregional migration in China, 2000-2005. *Popul Space*  
40 466 *Place* 2017; 23(4):1-17.
- 42 467 37 Kinge JM, Strand BH, Vollset SE, et al. Educational inequalities in obesity and gross domestic product:  
43 468 evidence from 70 countries. *J Epidemiol Community Health* 2015;69(12):1141-1146.
- 45  
46  
47  
48  
49  
50  
51  
52  
53  
54  
55  
56  
57  
58  
59  
60

**STROBE 2007 (v4) Statement—Checklist of items that should be included in reports of cross-sectional studies**

| Section/Topic                | Item # | Recommendation                                                                                                                                                                       | Reported on page # |
|------------------------------|--------|--------------------------------------------------------------------------------------------------------------------------------------------------------------------------------------|--------------------|
| Title and abstract           | 1      | (a) Indicate the study’s design with a commonly used term in the title or the abstract                                                                                               | 1                  |
|                              |        | (b) Provide in the abstract an informative and balanced summary of what was done and what was found                                                                                  | 2                  |
| <b>Introduction</b>          |        |                                                                                                                                                                                      | 4-5                |
| Background/rationale         | 2      | Explain the scientific background and rationale for the investigation being reported                                                                                                 | 4-5                |
| Objectives                   | 3      | State specific objectives, including any prespecified hypotheses                                                                                                                     | 5                  |
| <b>Methods</b>               |        |                                                                                                                                                                                      | 5-6                |
| Study design                 | 4      | Present key elements of study design early in the paper                                                                                                                              | 5                  |
| Setting                      | 5      | Describe the setting, locations, and relevant dates, including periods of recruitment, exposure, follow-up, and data collection                                                      | 5                  |
| Participants                 | 6      | (a) Give the eligibility criteria, and the sources and methods of selection of participants                                                                                          | 5                  |
| Variables                    | 7      | Clearly define all outcomes, exposures, predictors, potential confounders, and effect modifiers. Give diagnostic criteria, if applicable                                             | 6                  |
| Data sources/<br>measurement | 8*     | For each variable of interest, give sources of data and details of methods of assessment (measurement). Describe comparability of assessment methods if there is more than one group | 5                  |
| Bias                         | 9      | Describe any efforts to address potential sources of bias                                                                                                                            | 5                  |
| Study size                   | 10     | Explain how the study size was arrived at                                                                                                                                            | 5                  |
| Quantitative variables       | 11     | Explain how quantitative variables were handled in the analyses. If applicable, describe which groupings were chosen and why                                                         | 6                  |
| Statistical methods          | 12     | (a) Describe all statistical methods, including those used to control for confounding                                                                                                | 6                  |
|                              |        | (b) Describe any methods used to examine subgroups and interactions                                                                                                                  | 6                  |
|                              |        | (c) Explain how missing data were addressed                                                                                                                                          | 5                  |
|                              |        | (d) If applicable, describe analytical methods taking account of sampling strategy                                                                                                   | 6                  |
|                              |        | (e) Describe any sensitivity analyses                                                                                                                                                |                    |
| <b>Results</b>               |        |                                                                                                                                                                                      | 6-11               |

|                          |     |                                                                                                                                                                                                                                                                                                                                                                                                               |       |
|--------------------------|-----|---------------------------------------------------------------------------------------------------------------------------------------------------------------------------------------------------------------------------------------------------------------------------------------------------------------------------------------------------------------------------------------------------------------|-------|
| Participants             | 13* | (a) Report numbers of individuals at each stage of study—eg numbers potentially eligible, examined for eligibility, confirmed eligible, included in the study, completing follow-up, and analysed<br>(b) Give reasons for non-participation at each stage<br>(c) Consider use of a flow diagram                                                                                                               | 6-7   |
| Descriptive data         | 14* | (a) Give characteristics of study participants (eg demographic, clinical, social) and information on exposures and potential confounders<br>(b) Indicate number of participants with missing data for each variable of interest                                                                                                                                                                               | 6-7   |
| Outcome data             | 15* | Report numbers of outcome events or summary measures                                                                                                                                                                                                                                                                                                                                                          | 6     |
| Main results             | 16  | (a) Give unadjusted estimates and, if applicable, confounder-adjusted estimates and their precision (eg, 95% confidence interval). Make clear which confounders were adjusted for and why they were included<br>(b) Report category boundaries when continuous variables were categorized<br>(c) If relevant, consider translating estimates of relative risk into absolute risk for a meaningful time period | 8-9   |
| Other analyses           | 17  | Report other analyses done—eg analyses of subgroups and interactions, and sensitivity analyses                                                                                                                                                                                                                                                                                                                | 9-11  |
| <b>Discussion</b>        |     |                                                                                                                                                                                                                                                                                                                                                                                                               | 12-13 |
| Key results              | 18  | Summarise key results with reference to study objectives                                                                                                                                                                                                                                                                                                                                                      | 13    |
| Limitations              | 19  | Discuss limitations of the study, taking into account sources of potential bias or imprecision. Discuss both direction and magnitude of any potential bias                                                                                                                                                                                                                                                    | 13    |
| Interpretation           | 20  | Give a cautious overall interpretation of results considering objectives, limitations, multiplicity of analyses, results from similar studies, and other relevant evidence                                                                                                                                                                                                                                    | 12-13 |
| Generalisability         | 21  | Discuss the generalisability (external validity) of the study results                                                                                                                                                                                                                                                                                                                                         |       |
| <b>Other information</b> |     |                                                                                                                                                                                                                                                                                                                                                                                                               | 14-16 |
| Funding                  | 22  | Give the source of funding and the role of the funders for the present study and, if applicable, for the original study on which the present article is based                                                                                                                                                                                                                                                 | 14    |

\*Give information separately for cases and controls in case-control studies and, if applicable, for exposed and unexposed groups in cohort and cross-sectional studies.

**Note:** An Explanation and Elaboration article discusses each checklist item and gives methodological background and published examples of transparent reporting. The STROBE checklist is best used in conjunction with this article (freely available on the Web sites of PLoS Medicine at <http://www.plosmedicine.org/>, Annals of Internal Medicine at <http://www.annals.org/>, and Epidemiology at <http://www.epidem.com/>). Information on the STROBE Initiative is available at [www.strobe-statement.org](http://www.strobe-statement.org).

# BMJ Open

## Exploring the association between urbanization and self-rated health of the older adults in China: Evidence from a national population sample survey

|                                 |                                                                                                                                                                                                                                                                                                                                                                                                                                                                                                                                                                                                                                                                                                                                                               |
|---------------------------------|---------------------------------------------------------------------------------------------------------------------------------------------------------------------------------------------------------------------------------------------------------------------------------------------------------------------------------------------------------------------------------------------------------------------------------------------------------------------------------------------------------------------------------------------------------------------------------------------------------------------------------------------------------------------------------------------------------------------------------------------------------------|
| Journal:                        | <i>BMJ Open</i>                                                                                                                                                                                                                                                                                                                                                                                                                                                                                                                                                                                                                                                                                                                                               |
| Manuscript ID                   | bmjopen-2019-029176.R2                                                                                                                                                                                                                                                                                                                                                                                                                                                                                                                                                                                                                                                                                                                                        |
| Article Type:                   | Research                                                                                                                                                                                                                                                                                                                                                                                                                                                                                                                                                                                                                                                                                                                                                      |
| Date Submitted by the Author:   | 23-May-2019                                                                                                                                                                                                                                                                                                                                                                                                                                                                                                                                                                                                                                                                                                                                                   |
| Complete List of Authors:       | Liu, Ye; Sun Yat-Sen University, School of Geography and Planning; Sun Yat-Sen University, Guangdong Key Laboratory for Urbanization and Geo-simulation<br>Huang, Baishi; Sun Yat-Sen University, School of Geography and Planning; Sun Yat-Sen University, Guangdong Key Laboratory for Urbanization and Geo-simulation<br>Wang, Ruoyu; Sun Yat-Sen University, School of Geography and Planning; Sun Yat-Sen University, Guangdong Key Laboratory for Urbanization and Geo-simulation<br>Feng, Z; University of Southampton, Primary Care and Population Sciences, Faculty of Medicine<br>Liu, Yuqi; University of Hong Kong, The Department of Urban Planning and Design, Faculty of Architecture<br>Li, Zhigang; Wuhan University, School of Urban Design |
| <b>Primary Subject Heading</b>: | Public health                                                                                                                                                                                                                                                                                                                                                                                                                                                                                                                                                                                                                                                                                                                                                 |
| Secondary Subject Heading:      | Global health                                                                                                                                                                                                                                                                                                                                                                                                                                                                                                                                                                                                                                                                                                                                                 |
| Keywords:                       | urbanization, self-rated health, older people, national population sample survey, China                                                                                                                                                                                                                                                                                                                                                                                                                                                                                                                                                                                                                                                                       |
|                                 |                                                                                                                                                                                                                                                                                                                                                                                                                                                                                                                                                                                                                                                                                                                                                               |

SCHOLARONE™  
Manuscripts

1  
2  
3  
4  
5  
6  
7  
8  
9  
10  
11  
12  
13  
14  
15  
16  
17  
18  
19  
20  
21  
22  
23  
24  
25  
26  
27  
28  
29  
30  
31  
32  
33  
34  
35  
36  
37  
38  
39  
40  
41  
42  
43  
44  
45  
46  
47  
48  
49  
50  
51  
52  
53  
54  
55  
56  
57  
58  
59  
60

1 **Exploring the association between urbanization and self-rated health of the older**  
2 **adults in China: Evidence from a national population sample survey**

3

4 Ye Liu<sup>1,2</sup>, Baishi Huang<sup>1,2</sup>, Ruoyu Wang<sup>1,2</sup>, Zhixin Feng<sup>3</sup>, Yuqi Liu<sup>4</sup>, Zhigang Li<sup>5</sup>

5

6 <sup>1</sup>School of Geography and Planning, Sun Yat-Sen University, Guangzhou, China;

7 <sup>2</sup>Guangdong Key Laboratory for Urbanization and Geo-simulation, Sun Yat-Sen University,  
8 Guangzhou, China

9 <sup>3</sup> Primary Care and Population Sciences, Faculty of Medicine, University of Southampton,  
10 Southampton, Southampton, UK

11 <sup>4</sup>The Department of Urban Planning and Design, Faculty of Architecture, The University of Hong  
12 Kong, Hong Kong, China

13 <sup>5</sup>School of Urban Design, Wuhan University, Wuhan, China

14

15 **Corresponding author:**

16 Zhixin Feng, Room AB230, Level B, South Academic Block, University Hospital Southampton,  
17 Primary Care and Population Sciences, Faculty of Medicine, University of Southampton,  
18 Southampton, SO16 6YD, United Kingdom; +44 (0)23 8120 6533, frankfengs@gmail.com

19 Zhigang Li, School of Urban Design, Wuhan University, Wuhan 430072, China; +862787058902,  
20 zhigangli@whu.edu.cn

21

22 **Keywords:** urbanization; self-rated health; older people; national population sample survey;  
23 China

24

## 25 ABSTRACT

26 **Objectives** This study investigated the association between urbanization and self-rated health of  
27 older adults in China, particularly how different dimensions, rate, and level of urbanization are  
28 related to older people's. Additionally, it examined the moderating effect of education on the  
29 association between each of the four dimensions of urbanization and older people's health.

30  
31 **Design** The study uses a cross-sectional survey design.

## 34 Participants

35 This study analyzed 236,030 individuals (aged 60-79 years) nested within 267 prefecture-level  
36 cities from 2005 China's 1% population sample survey.

37  
38 **Outcome measures** Self-rated health was the outcome variable. Four groups of predictors  
39 assessed prefectures' level and rate of urbanization: land-use conversion, economic growth,  
40 population concentration, and health services. Multilevel logistic regression was used to examine  
41 the association between self-rated health and the level and rate of urbanization, after adjusting for  
42 individual-level covariates. Multiplicative interactions explored variations by education.

## 44 Results

45 The odds of reporting fair or poor health was negatively associated with the level and rate of  
46 population concentration (OR=0.93 (95%CI 0.87 to 0.99) and 0.74, (95%CI 0.59 to 0.93)  
47 respectively) and positively associated with the level of health services (OR=1.12, 95%CI 1.06 to  
48 1.19). Land-use conversion, economic growth, and health service improvements (the forms of rate  
49 of urbanization) were not significantly associated with self-rated health. Education had a  
50 moderating effect on the association between urbanization and self-rated health.

## 52 Conclusions

53 Older people living in more densely-populated areas and areas undergoing rapid population  
54 concentration were less likely to report fair or poor health. This result supports healthy migration  
55 and "salmon bias" hypotheses. No urban health penalty was observed for the older adults in  
56 China; therefore, the following pathways linking urbanization to health are unclear: lifestyle  
57 changes, environmental pollution, and cultivated land reduction.

## 59 Strengths and limitations of this study

- 60 ▶ The study considers the different dimensions of urbanization, thus capturing the complex  
61 association between urbanization and self-reported health of older adults in China.
- 62 ▶ It provides an in-depth understanding of the urbanization-health relationship among older  
63 adults.
- 64 ▶ The study used nationally representative survey data covering 267 prefectures across 31  
65 provinces, thus providing a more comprehensive picture of urbanization-health relationships  
66 across the country.
- 67 ▶ We were unable to capture the causal effect of changes in urbanization over time on older  
68 peoples' health outcomes due to the cross-sectional nature of the data.

1  
2  
3  
4  
5  
6  
7  
8  
9  
10  
11  
12  
13  
14  
15  
16  
17  
18  
19  
20  
21  
22  
23  
24  
25  
26  
27  
28  
29  
30  
31  
32  
33  
34  
35  
36  
37  
38  
39  
40  
41  
42  
43  
44  
45  
46  
47  
48  
49  
50  
51  
52  
53  
54  
55  
56  
57  
58  
59  
60

69

70 **Word count (abstract): 283**

71 **Word count (text excluding references, tables, figure legends): 3422**

For peer review only



## 72 INTRODUCTION

73 The 2018 revision of World Urbanization Prospects reported that 55% of the world's  
74 population lived in urban settlements, and it is expected to increase to 68% by 2050.<sup>1</sup> A lion's  
75 share of the future growth of the world's urban population is expected to happen in developing  
76 nations.<sup>1</sup> In advanced economies, city dwellers normally enjoy better living conditions, better  
77 healthcare access, and more effective public-health interventions than their rural counterparts do.  
78 However, in developing countries, where urbanization is rapid and unplanned, it is more likely to  
79 pose a threat to public health through environmental degradation, unhealthy lifestyles, increased  
80 stress, and inadequate sanitation.<sup>2-5</sup>

81 China, the largest developing country in the world, has been undergoing urbanization at an  
82 unprecedented rate over the last three decades.<sup>1</sup> A small but growing body of literature has  
83 investigated the effect of urbanization on the Chinese population's health.<sup>6-15</sup> Most earlier studies  
84 used either a single indicator (e.g. urbanization rate) or a composite indicator derived from a set of  
85 neighbourhood characteristics (e.g. urbanicity index) to assess the level of urbanization and  
86 explore its relationship with individual health.<sup>6-11</sup> However, these studies have failed to recognise  
87 urbanization as a multi-faceted process involving population concentration, economic growth,  
88 land-use conversion, infrastructure upgrading, and lifestyle changes, and that different aspects of  
89 urbanization may have complex effects on residents' health.<sup>5 16-18</sup> For example, the healthy  
90 migrant hypothesis suggests that a massive inflow of migrants to cities may improve the overall  
91 level of residents' health.<sup>19</sup> On the other hand, "salmon bias" hypothesis implies that the unhealthy  
92 migrants who are retired or close to retirement age may return to their rural and small-town  
93 hometowns. A traditional Chinese aphorism is: "Fallen leaves return to the roots" implying  
94 reverting to one's origin. Economic growth and land use change in rapidly industrializing  
95 countries are normally accompanied by increased environmental pollution, which is detrimental to  
96 residents' health.<sup>2 3 12 20 21</sup> On the other hand, economic growth may lead to better access to health  
97 knowledge and services, which could improve residents' health.<sup>5</sup> Lifestyle changes associated  
98 with urbanization, such as less physical activity and more high-calorie food intake, may also affect  
99 residents' health.<sup>8 22 23</sup> Therefore, considering the effects of multiple dimensions of urbanization  
100 on residents' health could provide a complete picture of how urbanization affects individual  
101 health.

102 Another limitation of previous studies is that the extent to which the urbanization rate  
103 influences residents' health has been rarely examined. For example, a previous study investigated  
104 the effect of living in more urbanized areas on health at a given time-point (i.e. urbanicity) in the  
105 Chinese context.<sup>6 8</sup> However, highly urbanized areas do not necessarily experience rapid  
106 urbanization.<sup>4 5 24</sup> The rate of urbanization also affects residents' health, as a rapid urban growth is  
107 usually accompanied by environmental and behavioural transitions, such as environmental  
108 deterioration, increased stress, lifestyle change, changing population composition, and declining  
109 social cohesion.<sup>2 4 5 8 22 25</sup> Only a few studies have considered both the level and rate of  
110 urbanization simultaneously. For example, Chen et al.<sup>16</sup> investigated the effects of urbanization on  
111 health using multiple measures of urbanization dynamics including the level and rate of  
112 urbanization; however, their conclusion was drawn from the analysis of a small-scale survey  
113 conducted in 27 prefectures, which had the limitations of poor generalizability and homogeneous  
114 environmental settings.<sup>26 27</sup> Therefore, including the rate of urbanization in the analytical  
115 framework of urbanization-health relationships is essential.

1  
2  
3 116 Another research gap is the lack of investigation into the moderating effect of individual  
4 117 attributes on urbanization-health relationships. It is hypothesised that these relationships vary by  
5 118 education, as higher- and lower-educated people are likely to have different health practices and  
6 119 different levels of access to health services in large cities, whereas this educational gap is less  
7 120 pronounced in small towns and rural areas.<sup>28 29</sup> It is also hypothesised that higher- and  
8 121 low-educated people have differing propensities to migrate, and the effect of health selective  
9 122 migration varies by education level.<sup>30</sup> Furthermore, higher- and lower-educated people differ in  
10 123 their ability to adapt to stress arising from rapid urbanization and consequent social life changes.<sup>5</sup>  
11 124<sup>22 31</sup> Therefore, the moderating effect of education on urbanization-health relationships among  
12 125 older people is worth exploring.

13  
14  
15  
16 126 This study aimed to investigate the association between urbanization and self-rated health of  
17 127 older adults using the 2005 China's 1% population sample survey and statistical data from  
18 128 statistical yearbooks. In particular, the study focused on how different dimensions of urbanization  
19 129 (population growth, land use change, economic growth, and health service improvement) are  
20 130 related to older people's health and how both the level and rate of urbanization are associated with  
21 131 their health. Further, it examined the moderating effect of education on the association between  
22 132 each of the four dimensions of urbanization and health. The study is significant in several respects.  
23 133 First, it considers the different dimensions of urbanization, thus capturing the complex association  
24 134 between urbanization and self-reported health of the older adults. Second, it provides an in-depth  
25 135 understanding of the urbanization-health relationship among older adults. Moreover, this study  
26 136 used nationally representative survey data covering 267 prefectures across 31 provinces, thus  
27 137 providing a more comprehensive picture of urbanization-health relationships across the country.

## 138 139 **METHODS**

### 140 **Data**

141 This study used individual micro-data from the 2005 China's 1% population sample survey  
142 (hereinafter, the 2005 survey). The 2005 survey was conducted by the National Bureau of  
143 Statistics of China using a stratified, cluster, and probability proportional to size (PPS) sampling.  
144 The survey team obtained written consents from each participant at the time of survey. We  
145 accessed the data with specific permission from the National Bureau of Statistics of China  
146 (<http://www.stats.gov.cn/>). The 2005 survey included 2.59 million individuals living in 340  
147 prefectures (including prefecture-level cities, prefectures in a narrow sense, leagues, and  
148 autonomous prefectures). Post-survey enumeration has indicated an undercount rate of 1.72%. We  
149 excluded individuals aged less than 60 years and further restricted the sample to those aged 60-79  
150 years, as those aged over 80 years had a higher risk of mortality. We excluded 3,701 (1.54% of the  
151 total) individuals aged 60-79 years who had any missing value in the outcome variable and  
152 covariates. The final dataset included 236,030 individuals from 267 prefecture-level cities. This  
153 study is exempt from ethical approval for the following reasons: first, the micro-data from the  
154 2005 survey did not contain any sensitive information; second, individuals who were involved in  
155 the survey were anonymous; third, access to the data was administered by a governmental  
156 organization that complied with various legal requirements about data protection.

### 157 158 **Patient and public involvement**

159 Patients or the public were not involved in this study.

1  
2  
3 1604 161 **Measures**

## 5 162 Outcome

6 163 The outcome variable in this study was self-reported health (SRH), which was the only question in  
7 164 the 2005 survey pertaining to health. SRH is a sensitive and reliable indicator of the current health  
8 165 status of older people, which has been widely used in previous studies.<sup>32-34</sup> Respondents were  
9 166 asked to assess their overall health status over the past month based on a three-point scale (good,  
10 167 fair, or poor). To simplify the analysis, we recoded the variable into a binary variable: 0 for good  
11 168 health and 1 for fair or poor health.

12 169

## 13 170 Predictors

14 171 The key predictors used to measure prefectures' urbanization level and rate included four  
15 172 specific dimensions of urbanization (land-use conversion, economic growth, population  
16 173 concentration, and health services). The ratio of urban built-up areas to the entire area, the gross  
17 174 domestic product per capita, population density, and the number of hospital beds per thousand  
18 175 population were used to assess the level of rural-urban land-use conversion, economic growth,  
19 176 population concentration, and health services, respectively. Further, the rates of land-use  
20 177 conversion, economic growth, concentration of population, and improvement in health services  
21 178 were considered using the changes in the corresponding indicators from 2000 to 2005.

22 179

## 23 180 Covariates

24 181 We adjusted for individual-level covariates: gender, age, ethnicity, marital status, urbanicity  
25 182 of current residence, *hukou* status (governmental household registration system), education,  
26 183 having primary endowment insurance, having basic medical insurance, housing area per capita,  
27 184 housing construction time, and the provision of four types of housing facilities (water supply,  
28 185 kitchen, toilet and bathroom).

29 186

## 30 187 Analysis

31 188 Multilevel logistic regression was used to examine the association between SRH and the level  
32 189 and rate of urbanization. The models were initially fitted with covariates only. We then added  
33 190 predictors related to both the level and rate of urbanization. Thereafter, these models were  
34 191 sequentially adjusted for interaction terms between the level or the rate of urbanization on one  
35 192 hand and education on the other. We performed a variance inflation factor test and found no  
36 193 multicollinearity among the variables. All analyses were conducted using STATA 14.0.

37 194

38 195 **RESULTS**

39 196 The descriptive analysis of the variables is presented in Table 1. Of all the respondents,  
40 197 66.19% reported good health, 22.73% reported fair health, and 11.08% reported poor health.  
41 198 62.12% of respondents were aged between 60 and 69, 96.5% of respondents were Han Chinese,  
42 199 75.3% of individuals were not married, 63.8% of respondents were local agricultural hukou, and  
43 200 about 90% of individuals with low education (junior high school or below). Only 25% had  
44 201 primary endowment insurance scheme, and about 40% had basic medical insurance scheme.  
45 202 About 50% of the respondents lived in rural areas. The average housing area per capita was 32.57  
46 203 square meters. About 77% lived in houses constructed after 1978, and 30% in houses with less

204 than two types of facilities.

205

206

**Table 1** Summary statistics of variables

|                                                                                        | Whole sample<br>(n=236,030) | Reported good<br>health<br>(n=156,222) | Reported fair or<br>poor health<br>(n=79,808) |
|----------------------------------------------------------------------------------------|-----------------------------|----------------------------------------|-----------------------------------------------|
| Self-reported health (%)                                                               |                             |                                        |                                               |
| Good                                                                                   | 66.19                       |                                        |                                               |
| Fair or poor                                                                           | 33.81                       |                                        |                                               |
| Predictors (prefecture-level variables)                                                |                             |                                        |                                               |
| Land-use conversion in 2005 (%)                                                        | 1.95 (3.48)                 | 2.06 (3.65)                            | 1.76 (3.13)                                   |
| GDP per capita in 2005 (10,000 Yuan)                                                   | 1.87 (1.49)                 | 1.91 (1.53)                            | 1.77 (1.40)                                   |
| Population density in 2005 (population per km <sup>2</sup> )                           | 548.98 (443.51)             | 562.51 (449.37)                        | 522.51 (430.58)                               |
| The number of hospital beds per thousand population in 2005 (bed)                      | 2.93 (1.53)                 | 2.96 (1.55)                            | 2.88 (1.49)                                   |
| The change in land-use conversion from 2000 to 2005 (%)                                | 59.10 (88.93)               | 60.70 (92.26)                          | 55.98 (81.92)                                 |
| The change in GDP per capita from 2000 to 2005 (%)                                     | 87.47 (41.19)               | 87.39 (41.90)                          | 87.63 (39.77)                                 |
| The change in population density from 2000 to 2005 (%)                                 | 3.40 (11.88)                | 3.59 (13.11)                           | 3.02 (8.97)                                   |
| The change in number of hospital beds per thousand population<br>from 2000 to 2005 (%) | 5.21 (13.46)                | 5.42 (13.44)                           | 4.80 (13.48)                                  |
| Gender (%)                                                                             |                             |                                        |                                               |
| Female                                                                                 | 48.74                       | 45.96                                  | 54.18                                         |
| Male                                                                                   | 51.26                       | 54.04                                  | 45.82                                         |
| Age (years) (%)                                                                        |                             |                                        |                                               |
| 60-64                                                                                  | 33.64                       | 41.11                                  | 19.02                                         |
| 65-69                                                                                  | 28.49                       | 29.86                                  | 25.80                                         |
| 70-74                                                                                  | 23.09                       | 19.18                                  | 30.76                                         |
| 75-79                                                                                  | 14.78                       | 9.85                                   | 24.42                                         |
| Ethnicity (%)                                                                          |                             |                                        |                                               |
| Han Chinese                                                                            | 96.49                       | 96.70                                  | 96.08                                         |
| Minority                                                                               | 3.51                        | 3.30                                   | 3.92                                          |
| Marital status (%)                                                                     |                             |                                        |                                               |
| Single, divorced, or widowed                                                           | 75.34                       | 79.77                                  | 66.67                                         |
| Married                                                                                | 24.66                       | 20.23                                  | 33.33                                         |
| Hukou status (%)                                                                       |                             |                                        |                                               |
| Local agricultural                                                                     | 63.77                       | 60.35                                  | 70.48                                         |
| Local non-agricultural                                                                 | 28.68                       | 31.13                                  | 23.87                                         |
| Non-local agricultural                                                                 | 2.37                        | 2.59                                   | 1.93                                          |
| Non-local non-agricultural                                                             | 5.18                        | 5.93                                   | 3.72                                          |
| Education (%)                                                                          |                             |                                        |                                               |
| No schooling                                                                           | 34.73                       | 28.09                                  | 47.72                                         |
| Elementary school or junior high school                                                | 55.04                       | 59.58                                  | 46.14                                         |
| Senior high school                                                                     | 6.12                        | 7.32                                   | 3.78                                          |
| College or above                                                                       | 4.11                        | 5.01                                   | 2.36                                          |
| Primary endowment insurance (%)                                                        |                             |                                        |                                               |

|                                           |               |               |               |
|-------------------------------------------|---------------|---------------|---------------|
| Had                                       | 24.68         | 27.55         | 19.05         |
| Did not have                              | 75.32         | 72.45         | 80.95         |
| Basic Medical insurance (%)               |               |               |               |
| Had                                       | 41.44         | 43.67         | 37.07         |
| Did not have                              | 58.56         | 56.33         | 62.93         |
| Urbanicity of current residence (%)       |               |               |               |
| Rural areas                               | 52.20         | 48.92         | 58.61         |
| Urban areas: towns                        | 14.87         | 15.47         | 13.69         |
| Urban areas: cities                       | 32.93         | 35.61         | 27.70         |
| Housing area per capita (m <sup>2</sup> ) | 32.57 (25.98) | 32.76 (25.81) | 32.21 (26.30) |
| Housing construction time (%)             |               |               |               |
| Before 1978                               | 22.62         | 20.63         | 26.52         |
| After 1978                                | 77.38         | 79.37         | 73.48         |
| Housing facilities (%)                    |               |               |               |
| None, one or two types of facilities      | 45.64         | 42.92         | 50.97         |
| Three types of facilities                 | 24.84         | 24.04         | 26.41         |
| Four types of facilities                  | 29.52         | 33.04         | 22.62         |

207 Note: results are presented as proportion for categorical variables and as mean (standard errors) for continuous variables. GDP Gross  
208 Domestic Product

209

210 Table 2 presents the results of the multilevel logistic regression. Model 1 includes covariates  
211 only. Older people who were female, of advanced age, not married, and less-educated were more  
212 likely to report fair or poor health than were their male, younger, married, and more-educated  
213 counterparts. Local and agricultural *hukou* holders were more likely to report fair or poor health  
214 than were their non-local and non-agricultural counterparts. Primary endowment insurance  
215 recipients and urban residents were less likely to report fair or poor health than were  
216 non-recipients and rural residents. Moreover, older people who lived in larger, more recently  
217 constructed and better-equipped houses were less likely to report fair or poor health than those  
218 living in smaller, older, and less-equipped houses.

219

220 **Table 2** Multilevel logistic regression estimates of reporting fair or poor health

| Effects and Variables                                                           | Model 1                | Model 2                |
|---------------------------------------------------------------------------------|------------------------|------------------------|
|                                                                                 | OR (95% CI)            | OR (95% CI)            |
| Fixed part                                                                      |                        |                        |
| Land-use conversion in 2005                                                     |                        | 0.99 (0.97 - 1.01)     |
| The change in land-use conversion from 2000 to 2005                             |                        | 0.96 (0.90 - 1.02)     |
| The logarithm GDP per capita in 2005                                            |                        | 0.91 (0.81 - 1.01)     |
| The change in GDP per capita from 2000 to 2005                                  |                        | 0.94 (0.85 - 1.05)     |
| The logarithm population density in 2005                                        |                        | 0.93 (0.87 - 0.99) *   |
| The change in population density from 2000 to 2005                              |                        | 0.74 (0.59 - 0.93) **  |
| The number of hospital beds per thousand population in 2005                     |                        | 1.12 (1.06 - 1.19) *** |
| The change in number of hospital beds per thousand population from 2000 to 2005 |                        | 0.91 (0.67 - 1.25)     |
| Females (ref: males)                                                            | 1.16 (1.14 - 1.19) *** | 1.16 (1.14 - 1.19) *** |

1  
2  
3  
4  
5  
6  
7  
8  
9  
10  
11  
12  
13  
14  
15  
16  
17  
18  
19  
20  
21  
22  
23  
24  
25  
26  
27  
28  
29  
30  
31  
32  
33  
34  
35  
36  
37  
38  
39

|                                                         |                           |                           |
|---------------------------------------------------------|---------------------------|---------------------------|
| Age (ref: 60-64)                                        |                           |                           |
| 65-69                                                   | 1.81 (1.77 - 1.86) ***    | 1.81 (1.77 - 1.86) ***    |
| 70-74                                                   | 3.19 (3.10 - 3.27) ***    | 3.19 (3.11 - 3.27) ***    |
| 75-79                                                   | 4.66 (4.53 - 4.80) ***    | 4.67 (4.53 - 4.81) ***    |
| Minority (ref: Han Chinese)                             |                           |                           |
| Single, divorced, or widowed (ref: married)             | 1.05 (1.00 - 1.11)        | 1.05 (0.99 - 1.10)        |
| Hukou status (ref: local agricultural)                  |                           |                           |
| Local non-agricultural                                  | 0.92 (0.89 - 0.95) ***    | 0.91 (0.88 - 0.94) ***    |
| Non-local agricultural                                  | 0.73 (0.69 - 0.78) ***    | 0.73 (0.69 - 0.78) ***    |
| Non-local non-agricultural                              | 0.83 (0.78 - 0.87) ***    | 0.82 (0.78 - 0.87) ***    |
| Education (ref: no schooling)                           |                           |                           |
| Elementary school or junior high school                 | 0.68 (0.67 - 0.70) ***    | 0.68 (0.67 - 0.70) ***    |
| Senior high school                                      | 0.60 (0.57 - 0.63) ***    | 0.60 (0.57 - 0.63) ***    |
| College or above                                        | 0.55 (0.52 - 0.58) ***    | 0.55 (0.52 - 0.58) ***    |
| Had primary endowment insurance (ref: did not have)     |                           |                           |
| Had Basic Medical insurance (ref: did not have)         | 0.88 (0.85 - 0.91) ***    | 0.88 (0.85 - 0.91) ***    |
| Urbanicity of current residence (ref: rural areas)      |                           |                           |
| Urban areas: towns                                      | 0.87 (0.84 - 0.89) ***    | 0.87 (0.84 - 0.89) ***    |
| Urban areas: cities                                     | 0.87 (0.84 - 0.90) ***    | 0.87 (0.84 - 0.89) ***    |
| Housing area per capita (m <sup>2</sup> )               |                           |                           |
| Housing construction time after 1978 (ref: before 1978) | 0.998 (0.997 - 0.999) *** | 0.998 (0.997 - 0.999) *** |
| Housing facilities (ref: none, one and two)             |                           |                           |
| Three                                                   | 0.99 (0.96 - 1.01)        | 0.99 (0.96 - 1.01)        |
| Four                                                    | 0.82 (0.80 - 0.85) ***    | 0.83 (0.80 - 0.85) ***    |
| Var (city-level constant)                               |                           |                           |
|                                                         | 0.14***                   | 0.11***                   |
| Log likelihood                                          |                           |                           |
|                                                         | -135659.94                | -135632.03                |
| AIC                                                     |                           |                           |
|                                                         | 271363.90                 | 271324.10                 |
| ICC                                                     |                           |                           |
|                                                         | 0.04                      | 0.03                      |

221 Note: OR: odds ratio; 95% confidence intervals in brackets; \* p<0.05, \*\* p<0.01, \*\*\* p<0.001.

222

223 The results of Model 2 show that the level and rate of population concentration were  
 224 negatively associated with the odds of reporting fair or poor health (OR=0.93 (95%CI 0.87 to  
 225 0.99) and 0.74 (95%CI 0.59 to 0.93) respectively), while the level of health services was  
 226 positively correlated with the odds of reporting fair or poor health (OR=1.12, 95%CI 1.06 to 1.19).  
 227 There was no significant relationship between the odds of reporting fair or poor health and the  
 228 level of land use conversion, economic growth (land use conversion: OR=0.99, 95%CI 0.97 to  
 229 1.01; economic growth: OR= 0.91, 95%CI 0.81 to 1.01). Similarly, no significant relationship was  
 230 observed between the odds of reporting fair or poor health and land use conversion rate, economic  
 231 growth rate, and health service improvement (land use conversion rate: OR=0.96, 95%CI 0.90 to  
 232 1.02; economic growth rate: OR=0.94, 95%CI 0.85 to 1.05; health service improvement:  
 233 OR=0.91, 95%CI 0.67 to 1.25).

234 The results of the moderating effect of education on the association between the level of  
 235 urbanization and SRH are shown in Table 3. The level of land use conversion was negatively  
 236 associated with the SRH of the least educated (OR=0.98, 95%CI 0.96 to 1.00) and positively

1  
2  
3 237 associated with the odds of those who had completed primary education reporting fair or poor  
4 238 health (OR=1.02, 95%CI 1.02 to 1.03; OR=1.04, 95%CI 1.03 to 1.05; and OR=1.03, 95%CI 1.02  
5  
6  
7  
8  
9  
10  
11  
12  
13  
14  
15  
16  
17  
18  
19  
20  
21  
22  
23  
24  
25  
26  
27  
28  
29  
30  
31  
32  
33  
34  
35  
36  
37  
38  
39  
40  
41  
42  
43  
44  
45  
46  
47  
48  
49  
50  
51  
52  
53  
54  
55  
56  
57  
58  
59  
60

For peer review only

1  
2  
3  
4  
5  
6  
7  
8  
9  
10  
11  
12  
13  
14  
15  
16  
17  
18  
19  
20  
21  
22  
23  
24  
25  
26  
27  
28  
29  
30  
31  
32  
33  
34  
35  
36  
37  
38  
39  
40  
41  
42  
43  
44  
45  
46

239 to 1.05) (Model 3). The level of economic growth was not significantly associated with the SRH of the least educated (OR=0.95, 95%CI 0.88 to 1.02) and was  
 240 positively associated with that of other educational groups (OR=1.08, 95%CI 1.05 to 1.12; OR=1.19, 95%CI 1.11 to 1.26; and OR=1.14, 95%CI 1.05 to 1.24) (Model  
 241 4). The level of population concentration was negatively correlated with the odds of reporting fair or poor health across all educational groups, and the strength of the  
 242 negative relationship decreased with higher level of education (OR=0.84, 95%CI 0.79 to 0.89; OR=1.08, 95%CI 1.05 to 1.10; OR=1.19, 95%CI 1.13 to 1.26; and  
 243 OR=1.19, 95%CI 1.11 to 1.28) (Model 5). The level of health services was positively correlated with the odds of reporting fair or poor health across all educational  
 244 groups with the strongest positive relationship found in senior high school (OR=1.05, 95%CI 1.01 to 1.09; OR=1.04, 95%CI 1.02 to 1.05; OR=1.07, 95%CI 1.04 to  
 245 1.10; and OR=1.04, 95%CI 1.00 to 1.07) (Model 6).  
 246  
 247

**Table 3** The relationship between the level of urbanization and the odds of reporting fair or poor health moderated by education

| Variables                                                         | Model 3 (IV: land-use conversion) | Model 4 (IV: logarithm GDP per capita) | Model 5 (IV: logarithm population density) | Model 6 (IV: health institutional beds per 1000 population) |
|-------------------------------------------------------------------|-----------------------------------|----------------------------------------|--------------------------------------------|-------------------------------------------------------------|
|                                                                   | OR (95% CI)                       | OR (95% CI)                            | OR (95% CI)                                | OR (95% CI)                                                 |
| The level of urbanization in 2005                                 | 0.98 (0.96 - 1.00) *              | 0.95 (0.88 - 1.02)                     | 0.84 (0.79 - 0.89) ***                     | 1.05 (1.01 - 1.09) *                                        |
| The rate of urbanization from 2000 to 2005                        | 0.92 (0.87 - 0.98) *              | 0.98 (0.88 - 1.08)                     | 0.73 (0.58 - 0.92) **                      | 0.79 (0.58 - 1.08)                                          |
| Education (ref: no schooling)                                     |                                   |                                        |                                            |                                                             |
| Elementary school or junior high school                           | 0.69 (0.67 - 0.70) ***            | 0.69 (0.67 - 0.70) ***                 | 0.69 (0.67 - 0.70) ***                     | 0.69 (0.67 - 0.70) ***                                      |
| Senior high school                                                | 0.59 (0.56 - 0.62) ***            | 0.59 (0.56 - 0.62) ***                 | 0.59 (0.56 - 0.62) ***                     | 0.59 (0.55 - 0.62) ***                                      |
| College or above                                                  | 0.53 (0.50 - 0.57) ***            | 0.54 (0.50 - 0.58) ***                 | 0.53 (0.50 - 0.57) ***                     | 0.55 (0.51 - 0.59) ***                                      |
| The level of urbanization * education (ref: level * no schooling) |                                   |                                        |                                            |                                                             |
| Level * elementary school or junior high school                   | 1.02 (1.02 - 1.03) ***            | 1.08 (1.05 - 1.12) ***                 | 1.08 (1.05 - 1.10) ***                     | 1.04 (1.02 - 1.05) ***                                      |
| Level * senior high school                                        | 1.04 (1.03 - 1.05) ***            | 1.19 (1.11 - 1.26) ***                 | 1.19 (1.13 - 1.26) ***                     | 1.07 (1.04 - 1.10) ***                                      |
| Level * college or above                                          | 1.03 (1.02 - 1.05) ***            | 1.14 (1.05 - 1.24) **                  | 1.19 (1.11 - 1.28) ***                     | 1.04 (1.00 - 1.07) *                                        |

Note: OR: odds ratio; 95% confidence intervals in brackets; \* p<0.05, \*\* p<0.01, \*\*\* p<0.001. All models have been adjusted for individual covariates shown in Table 2.

248  
 249  
 250 Table 4 presents the results of the moderating effect of education in the association between the rate of urbanization and SRH. The rate of land-use conversion



was negatively correlated with the SRH of the least educated (OR=0.92, 95%CI 0.86 to 0.98) and not significantly associated with the odds of those who had completed primary education reporting fair or poor health (OR=1.01, 95%CI 0.99 to 1.04; OR=1.04, 95%CI 0.99 to 1.10; and OR=1.06, 95%CI 1.00 to 1.13) (Model 7). Economic growth rate was negatively correlated with the odds of those who had education of junior high school or below reporting fair or poor health (OR=0.95, 95%CI 0.91 to 1.00) and not significantly correlated with other educational groups' SRH (OR=1.00, 95%CI 0.90 to 1.12; OR=0.94, 95%CI 0.84 to 1.05; and OR=0.96, 95%CI 0.84 to 1.10) (Model 8). The rate of population concentration was negatively associated with the odds of those without schooling reporting fair or poor health (OR=0.73, 95%CI 0.56 to 0.94) and not significantly associated with that of those who had senior high school education (OR=0.99, 95%CI 0.81 to 1.22; OR=1.48, 95%CI 0.97 to 2.24; and OR=0.89, 95%CI 0.52 to 1.51) (Model 9). The rate of health service improvement was positively correlated with the SRH of the most educated (OR=1.88, 95%CI 1.21 to 2.94) (Model 10).

**Table 4** The relationship between the rate of urbanization and the odds of reporting fair or poor health moderated by education

| Variables                                                         | Model 7 (IV: land-use conversion) | Model 8 (IV: logarithm GDP per capita) | Model 9 (IV: logarithm population density) | Model 10 (IV: health institutional beds per 1000 population) |
|-------------------------------------------------------------------|-----------------------------------|----------------------------------------|--------------------------------------------|--------------------------------------------------------------|
|                                                                   | OR (95% CI)                       | OR (95% CI)                            | OR (95% CI)                                | OR (95% CI)                                                  |
| The level of urbanization in 2005                                 | 1.00 (0.98 - 1.02)                | 1.00 (0.93 - 1.07)                     | 0.88 (0.83 - 0.93) ***                     | 1.07 (1.04 - 1.11) ***                                       |
| The rate of urbanization from 2000 to 2005                        | 0.92 (0.86 - 0.98) **             | 1.00 (0.90 - 1.12)                     | 0.73 (0.56 - 0.94) *                       | 0.79 (0.57 - 1.09)                                           |
| Education (ref: no schooling)                                     |                                   |                                        |                                            |                                                              |
| Elementary school or junior high school                           | 0.68 (0.67 - 0.70) ***            | 0.68 (0.67 - 0.70) ***                 | 0.68 (0.67 - 0.70) ***                     | 0.68 (0.67 - 0.70) ***                                       |
| Senior high school                                                | 0.60 (0.57 - 0.63) ***            | 0.60 (0.57 - 0.63) ***                 | 0.60 (0.57 - 0.63) ***                     | 0.60 (0.57 - 0.63) ***                                       |
| College or above                                                  | 0.55 (0.52 - 0.58) ***            | 0.55 (0.52 - 0.58) ***                 | 0.55 (0.52 - 0.58) ***                     | 0.55 (0.52 - 0.58) ***                                       |
| The speed of urbanization * education (ref: speed * no schooling) |                                   |                                        |                                            |                                                              |
| Rate * elementary school or junior high school                    | 1.01 (0.99 - 1.04)                | 0.95 (0.91 - 1.00) *                   | 0.99 (0.81 - 1.22)                         | 0.98 (0.85 - 1.13)                                           |
| Rate * senior high school                                         | 1.04 (0.99 - 1.10)                | 0.94 (0.84 - 1.05)                     | 1.48 (0.97 - 2.24)                         | 1.03 (0.72 - 1.46)                                           |
| Rate * college or above                                           | 1.06 (1.00 - 1.13)                | 0.96 (0.84 - 1.10)                     | 0.89 (0.52 - 1.51)                         | 1.88 (1.21 - 2.94) **                                        |

Note: OR odds ratio; 95% confidence intervals in brackets; \* p<0.05, \*\* p<0.01, \*\*\* p<0.001. All models have been adjusted for individual covariates shown in Table 2.

**DISCUSSION**

This study is the first study to examine the association between the multiple dimensions of urbanization and SRH among older adults using nationally-representative survey data covering most of the prefectures in China. In contrast to previous studies examining urban health penalty in Chinese people across all ages,<sup>6-8 16</sup> our findings show that living in more densely-populated areas and areas undergoing rapid population concentration decreases older people's odds of reporting fair or poor health. Fast-growing and densely populated cities draw numerous healthy and working-aged migrants from rural and small-town areas,<sup>35 36</sup> and most of these migrants still perceive themselves to be healthy when they cross the age of 60 years (healthy migration phenomenon)<sup>19</sup>. On the other hand, as per traditional Chinese culture, people revert to their origin when they are old; migrants who perceive themselves to be unhealthy are likely to return to their rural and small-town hometowns when they retire or are close to retirement age ("salmon bias" phenomenon)<sup>30</sup>. Additionally, unhealthy older migrants would go back to their hometowns to avoid high healthcare expenditure in urban areas. The health selective migration partially accounts for the positive association between population concentration and SRH.

Earlier studies have attributed urban health penalty in China to changes in health behaviours associated with urbanization.<sup>7 8 16</sup> Specifically, people living in more urbanized areas are more likely to have unhealthy lifestyles, such as insufficient physical activity and high-fat and high-calorie intake.<sup>7 8 16</sup> Nevertheless, our study found no evidence that economic growth and population concentration may have a detrimental effect on people's SRH. This suggests that the pathway of lifestyle is less pronounced for older people than for the working-age population in China, as many older people living in well-developed and densely populated areas still maintain their existing healthy lifestyle (i.e., more physical activities and less high-fat and high-calorie intake) that was established many years ago (when China was a less developed and isolated country). Another pathway of urban health penalty involves environmental pollution and decrease in cultivated land.<sup>2 8 12</sup> However, our results show no relationship between land use conversion and economic growth on the one hand and older people's SRH on the other, which suggests that environmental pollution and decrease in cultivated land might play little role in the association between urbanization and older people's SRH.

Urbanization may also positively affect people's health through improved healthcare services and quality of life.<sup>5</sup> These pathways are associated with two dimensions of urbanization, economic growth and health service improvements, which are found to be either non-significantly or counter-intuitively positively related to older people's odds of reporting fair or poor health. Economic growth was not accompanied by an increase in older people's odds of reporting fair or poor health, probably because health benefits as a result of economic growth might be offset by associated detrimental effects such as environmental deterioration, increased stress, and weakened social bonds. Surprisingly, the level of health services was positively associated with the odds of older people reporting fair or poor health, and health service improvement was not linked to an increase in older people's odds of reporting fair or poor health. One possible explanation for this finding is that older people living in areas with better health services are more likely to receive health knowledge and be aware of their trivial illnesses, and thus, may report themselves as unhealthy.

Education had a moderating effect on the association between each of the four dimensions of urbanization and older people's SRH. Land use conversion was negatively associated with the

1  
2  
3 306 odds of the least educated individuals reporting fair or poor health. One explanation is that older  
4 307 people without education are indigenous peasants living in their home villages. Those living in  
5 308 areas with a high proportion of urban land and areas that undergo rapid land use conversion  
6 309 usually have a better economic well-being and quality of life than do their less-urbanized  
7 310 counterparts, and thus report a better health status. The effects of land use conversion and  
8 311 economic growth on older people's SRH are more detrimental to those who are more educated,  
9 312 probably because health behaviours differ greatly between those who are more educated and those  
10 313 who are less educated in economically developed areas.<sup>7 37</sup> People with a higher level of education  
11 314 are more likely to consume more food than needed and adopt a new lifestyle than do less-educated  
12 315 people. Moreover, high-fat and high-calorie diets and sedentary behaviour are more prevalent in  
13 316 economically developed areas. By contrast, the educational gap in health behaviours is less  
14 317 pronounced in less-developed areas, as educated people in these areas do not have an unhealthy  
15 318 diet and sedentary behaviour.<sup>7</sup> The negative effect of population concentration on older people's  
16 319 likelihood of reporting fair or poor health was stronger for the less-educated than for the  
17 320 more-educated, probably because in the Chinese context, the effect of health-selective migration is  
18 321 stronger for less-educated people who are often manual labourers and whose employment  
19 322 opportunities rely on their physical health conditions. The relationship between the level of health  
20 323 service and fair or poor SRH was positive; the rate of health service improvement was positively  
21 324 correlated with fair or poor SRH for the most educated individuals. This suggests that they tend to  
22 325 have stronger health awareness and higher expectations regarding their health when already living  
23 326 in areas with a high level of health services.

24 327 This study has some limitations. First, we were unable to capture the causal effect of changes  
25 328 in urbanization over time on older peoples' health outcomes due to the cross-sectional nature of  
26 329 the data. Second, our estimates of the effect of urbanization on health might be subject to  
27 330 self-selection bias, as older people with certain observed or unobserved characteristics (e.g. having  
28 331 well-educated parents) are more likely to live in more urbanized areas and report better health than  
29 332 are those who do not have those characteristics. Given that the middle-aged and older people in  
30 333 China have a low migration rate, we can assume that self-selection bias is not a severe issue for  
31 334 the present study. Third, we did not explore the pathways (e.g. health behaviours, the use of  
32 335 health-care facilities and services, and social capital) through which urbanization affects SRH due  
33 336 to the lack of relevant information in our dataset.

34 337 In conclusion, the results show that the odds of older people reporting fair or poor health is  
35 338 negatively correlated with the level and rate of population concentration and is positively  
36 339 correlated with the level of health services. These findings support the healthy migration and  
37 340 "salmon bias" hypotheses. Education had a moderating effect on the association between each of  
38 341 the four dimensions of urbanization and older people's SRH. The possible explanations for the  
39 342 difference between more educated and less educated older people in terms of urbanization-health  
40 343 relationships include health-selective migration, differing quality of life, differing health  
41 344 behaviours, and varying health expectations. Public efforts such as the equitable distribution of  
42 345 health services and the elimination of social exclusion of migrants should be made to decrease  
43 346 health inequalities among older people in China.

44 347  
45 348  
46 349

1  
2  
3 350 **Acknowledgments** Data used in this paper is derived from the 2005 China's one per cent  
4 351 population sample survey by the National Bureau of Statistics of China. The authors appreciate  
5 352 the assistance in providing data by the institutes and individuals aforementioned. The views  
6 353 expressed herein are the authors.  
7  
8 354

9  
10 355 **Contributors** YL, BH, ZF and ZL conceived the research question and designed the study. BH  
11 356 and RW performed statistical analysis. YL and BH drafted the manuscript, all authors contributed  
12 357 to the subsequent revisions of the manuscript, and approved the final version of the submitted  
13 358 manuscript.  
14  
15 359

16 360 **Funding** This research was funded by the National Natural Science Foundation of China (No.  
17 361 41871140, No. 41771167), Innovative Research and Development Team Introduction Program of  
18 362 Guangdong Province (No. 2017ZT07X355) and Guangzhou Science & Technology Project  
19 363 Applied Basic Research Programs (20183700042050443) supported this research.  
20  
21 364

22  
23 365 **Competing interests** None declared.  
24  
25 366

26 367 **Data sharing statement** No data are available  
27  
28 368  
29 369  
30 370  
31 371  
32 372  
33 373  
34 374  
35 375  
36 376  
37 377  
38 378  
39 379  
40 380  
41 381  
42 382  
43 383  
44 384  
45 385  
46 386  
47 387  
48 388  
49 389  
50 390  
51 391  
52 392  
53 393  
54  
55  
56  
57  
58  
59  
60

394 **REFERENCES**

- 395 1 United Nations, Department of Economic and Social Affairs, Population Division. The 2018 revision of  
 396 the world urbanization prospects; 2018. [https://population.un.org/wup/Publications/Files/WUP2018-PressR](https://population.un.org/wup/Publications/Files/WUP2018-PressRelease.pdf)  
 397 [elease.pdf](https://population.un.org/wup/Publications/Files/WUP2018-PressRelease.pdf) (accessed 15 Oct 2018).
- 398 2 Gong P, Liang S, Carlton EJ, et al. Urbanisation and health in China. *The Lancet* 2012;379(9818):843-852.
- 399 3 Moore M, Gould P, Keary BS. Global urbanization and impact on health. *Int J Hyg Envir Heal*  
 400 2003;206(4-5):269-278.
- 401 4 Vlahov D, Freudenberg N, Proietti F, et al. Urban as a determinant of health. *J Urban Health* 2007;84(1):16-26.
- 402 5 Vlahov D, Galea S. Urbanization, urbanicity, and health. *J Urban Health* 2002;79(Suppl 1):S1-S12.
- 403 6 Chen H, Liu Y, Li Z, et al. Urbanization, economic development and health: evidence from China's labor-force  
 404 dynamic survey. *Int J Equity Health* 2017;16(1):207-214.
- 405 7 Miao J, Wu X. Urbanization, socioeconomic status and health disparity in China. *Health Place* 2016;42:87-95.
- 406 8 Van de Poel E, O'Donnell O, Van Doorslaer E. Is there a health penalty of China's rapid urbanization? *Health*  
 407 *Econ* 2012;21(4):367-385.
- 408 9 Van de Poel E, O'Donnell O, Van Doorslaer E. Urbanization and the spread of diseases of affluence in China.  
 409 *Econ Hum Biol* 2009;7(2):200-216.
- 410 10 Jones-Smith JC, Popkin BM. Understanding community context and adult health changes in China:  
 411 development of an urbanicity scale. *Soc Sci Med* 2010;71(8):1436-1446.
- 412 11 Thompson AL, Houck KM, Adair L, et al. Multilevel examination of the association of urbanization with  
 413 inflammation in Chinese adults. *Health Place* 2014;28:177-186.
- 414 12 Li X, Song J, Lin T, et al. Urbanization and health in China, thinking at the national, local and individual levels.  
 415 *Environ Health-Glob* 2016;15:113-123.
- 416 13 Li X, Wang C, Zhang G, et al. Urbanisation and human health in China: spatial features and a systemic  
 417 perspective. *Environ Sci Pollut R* 2012;19(5):1375-1384.
- 418 14 Wang R, Xue D, Liu Y, et al. The relationship between urbanization and depression in China: the mediating  
 419 role of neighborhood social capital. *Int J Equity Health* 2018;17:105-114.
- 420 15 Sun R, Gu D. Air pollution, economic development of communities, and health status among the elderly in  
 421 urban China. *Am J Epidemiol* 2008;168(11):1311-1318.
- 422 16 Chen J, Chen S, Landry PF, et al. How dynamics of urbanization affect physical and mental health in urban  
 423 China. *China Quart* 2014;220:988-1011.
- 424 17 Chen H, Liu Y, Zhu Z, et al. Does where you live matter to your health? Investigating factors that influence the  
 425 self-rated health of urban and rural Chinese residents: evidence drawn from Chinese General Social Survey  
 426 data. *Health Qual Life Out* 2017;15(1):78-88.
- 427 18 Villanueva K, Pereira G, Knuiman M, et al. The impact of the built environment on health across the life  
 428 course: design of a cross-sectional data linkage study. *BMJ Open* 2013;3:e002482.
- 429 19 Abraído-Lanza AF, Dohrenwend BP, Ng-Mak DS, et al. The Latino mortality paradox: a test of the "salmon  
 430 bias" and healthy migrant hypotheses. *Am J Public Health* 1999;89(10):1543-1548.
- 431 20 Wang R, Liu Y, Xue D, et al. Cross-sectional associations between long-term exposure to particulate matter and  
 432 depression in China: The mediating effects of sunlight, physical activity, and neighborly reciprocity. *J Affect*  
 433 *Disord* 2019; 249: 8-14.
- 434 21 Wang R, Xue D, Liu Y, et al. The relationship between air pollution and depression in China: Is neighbourhood  
 435 social capital protective? *Int J Environ Res Public Health* 2018; 15(6): 1160-1173.
- 436 22 Harpham T. Urbanization and mental health in developing countries: a research role for social scientists, public  
 437 health professionals and social psychiatrists. *Soc Sci Med* 1994;39(2):233-245.

- 1  
2  
3 438 23 Abuladze L, Kunder N, Lang K, et al. Associations between self-rated health and health behaviour among older  
4 439 adults in Estonia: a cross-sectional analysis. *BMJ Open* 2017;7:e013257.
- 6 440 24 Ng SW, Norton EC, Popkin BM. Why have physical activity levels declined among Chinese adults? Findings  
7 441 from the 1991-2006 China health and nutrition surveys. *Soc Sci Med* 2009;68(7):1305-1314.
- 8 442 25 Chen M, Zhang H, Liu W, et al. The global pattern of urbanization and economic growth: evidence from the  
9 443 last three decades. *Plos One* 2014;9(8):e103799.
- 11 444 26 Xu Z, Ouyang A. The factors influencing China's population distribution and spatial heterogeneity: a  
12 445 prefectural-level analysis using geographically weighted regression. *Appl Spat Anal Polic* 2018;11(3):465-480.
- 14 446 27 Xiang H, Yang J, Zhang T, et al. Analyzing in-migrants and out-migrants in urban China. *Appl Spat Anal Polic*  
15 447 2018;11(1):81-102.
- 16 448 28 Mackenbach JP, Irina S, Roskam AJR, et al. Socioeconomic inequalities in health in 22 European countries.  
17 449 *New Engl J Med* 2008;358(23):2468-2481.
- 19 450 29 Ross CE, Mirowsky J. Refining the association between education and health: the effects of quantity,  
20 451 credential, and selectivity. *Demography* 1999;36(4):445-460.
- 21 452 30 Norman P, Boyle P, Rees P. Selective migration, health and deprivation: a longitudinal analysis. *Soc Sci Med*  
22 453 2005;60(12):2755-2771.
- 24 454 31 Feng Z, Phillips DR, Jones K. A geographical multivariable multilevel analysis of social exclusion among older  
25 455 people in China: evidence from the China Longitudinal Aging Social Survey ageing study. *The Geographical*  
26 456 *Journal* 2018;184(4):413-428.
- 28 457 32 Feng Z, Wang WW, Jones K. A multilevel analysis of the role of the family and the state in self-rated health of  
29 458 elderly Chinese. *Health Place* 2013;23:148-156.
- 30 459 33 Wu Z, Schimmele CM. Psychological disposition and self-reported health among the 'oldest-old' in China.  
31 460 *Ageing Soc* 2006;26(1):135-151.
- 33 461 34 Lima-Costa MF, Cesar CC, Chor D, et al. Self-rated health compared with objectively measured health status as  
34 462 a tool for mortality risk screening in older adults: 10-year follow-up of the Bambuí Cohort Study of Aging.  
35 463 *AM J Epidemiol* 2012;175(3):228-235.
- 37 464 35 Liu Y, Xu W. Destination choices of permanent and temporary migrants in China, 1985-2005. *Popul Space*  
38 465 *Place* 2017; 23(1):1-17.
- 39 466 36 Liu Y, Shen J. Modeling skilled and less-skilled interregional migration in China, 2000-2005. *Popul Space*  
40 467 *Place* 2017; 23(4):1-17.
- 42 468 37 Kinge JM, Strand BH, Vollset SE, et al. Educational inequalities in obesity and gross domestic product:  
43 469 evidence from 70 countries. *J Epidemiol Community Health* 2015;69(12):1141-1146.

**STROBE 2007 (v4) Statement—Checklist of items that should be included in reports of *cross-sectional studies***

| Section/Topic                | Item # | Recommendation                                                                                                                                                                       | Reported on page # |
|------------------------------|--------|--------------------------------------------------------------------------------------------------------------------------------------------------------------------------------------|--------------------|
| Title and abstract           | 1      | (a) Indicate the study's design with a commonly used term in the title or the abstract                                                                                               | 1                  |
|                              |        | (b) Provide in the abstract an informative and balanced summary of what was done and what was found                                                                                  | 2                  |
| <b>Introduction</b>          |        |                                                                                                                                                                                      | 4-5                |
| Background/rationale         | 2      | Explain the scientific background and rationale for the investigation being reported                                                                                                 | 4-5                |
| Objectives                   | 3      | State specific objectives, including any prespecified hypotheses                                                                                                                     | 5                  |
| <b>Methods</b>               |        |                                                                                                                                                                                      | 5-6                |
| Study design                 | 4      | Present key elements of study design early in the paper                                                                                                                              | 5                  |
| Setting                      | 5      | Describe the setting, locations, and relevant dates, including periods of recruitment, exposure, follow-up, and data collection                                                      | 5                  |
| Participants                 | 6      | (a) Give the eligibility criteria, and the sources and methods of selection of participants                                                                                          | 5                  |
| Variables                    | 7      | Clearly define all outcomes, exposures, predictors, potential confounders, and effect modifiers. Give diagnostic criteria, if applicable                                             | 6                  |
| Data sources/<br>measurement | 8*     | For each variable of interest, give sources of data and details of methods of assessment (measurement). Describe comparability of assessment methods if there is more than one group | 5                  |
| Bias                         | 9      | Describe any efforts to address potential sources of bias                                                                                                                            | 5                  |
| Study size                   | 10     | Explain how the study size was arrived at                                                                                                                                            | 5                  |
| Quantitative variables       | 11     | Explain how quantitative variables were handled in the analyses. If applicable, describe which groupings were chosen and why                                                         | 6                  |
| Statistical methods          | 12     | (a) Describe all statistical methods, including those used to control for confounding                                                                                                | 6                  |
|                              |        | (b) Describe any methods used to examine subgroups and interactions                                                                                                                  | 6                  |
|                              |        | (c) Explain how missing data were addressed                                                                                                                                          | 5                  |
|                              |        | (d) If applicable, describe analytical methods taking account of sampling strategy                                                                                                   | 6                  |
|                              |        | (e) Describe any sensitivity analyses                                                                                                                                                | 6                  |
| <b>Results</b>               |        |                                                                                                                                                                                      | 6-11               |

|                          |     |                                                                                                                                                                                                              |       |
|--------------------------|-----|--------------------------------------------------------------------------------------------------------------------------------------------------------------------------------------------------------------|-------|
| Participants             | 13* | (a) Report numbers of individuals at each stage of study—eg numbers potentially eligible, examined for eligibility, confirmed eligible, included in the study, completing follow-up, and analysed            | 6-7   |
|                          |     | (b) Give reasons for non-participation at each stage                                                                                                                                                         | 6-7   |
|                          |     | (c) Consider use of a flow diagram                                                                                                                                                                           | 6-7   |
| Descriptive data         | 14* | (a) Give characteristics of study participants (eg demographic, clinical, social) and information on exposures and potential confounders                                                                     | 6-7   |
|                          |     | (b) Indicate number of participants with missing data for each variable of interest                                                                                                                          | 6-7   |
| Outcome data             | 15* | Report numbers of outcome events or summary measures                                                                                                                                                         | 6     |
| Main results             | 16  | (a) Give unadjusted estimates and, if applicable, confounder-adjusted estimates and their precision (eg, 95% confidence interval). Make clear which confounders were adjusted for and why they were included | 8-9   |
|                          |     | (b) Report category boundaries when continuous variables were categorized                                                                                                                                    | 6     |
|                          |     | (c) If relevant, consider translating estimates of relative risk into absolute risk for a meaningful time period                                                                                             | N/A   |
| Other analyses           | 17  | Report other analyses done—eg analyses of subgroups and interactions, and sensitivity analyses                                                                                                               | 9-11  |
| <b>Discussion</b>        |     |                                                                                                                                                                                                              | 12-13 |
| Key results              | 18  | Summarise key results with reference to study objectives                                                                                                                                                     | 13    |
| Limitations              | 19  | Discuss limitations of the study, taking into account sources of potential bias or imprecision. Discuss both direction and magnitude of any potential bias                                                   | 13    |
| Interpretation           | 20  | Give a cautious overall interpretation of results considering objectives, limitations, multiplicity of analyses, results from similar studies, and other relevant evidence                                   | 12-13 |
| Generalisability         | 21  | Discuss the generalisability (external validity) of the study results                                                                                                                                        | 13-14 |
| <b>Other information</b> |     |                                                                                                                                                                                                              | 14-16 |
| Funding                  | 22  | Give the source of funding and the role of the funders for the present study and, if applicable, for the original study on which the present article is based                                                | 14    |

\*Give information separately for cases and controls in case-control studies and, if applicable, for exposed and unexposed groups in cohort and cross-sectional studies.

**Note:** An Explanation and Elaboration article discusses each checklist item and gives methodological background and published examples of transparent reporting. The STROBE checklist is best used in conjunction with this article (freely available on the Web sites of PLoS Medicine at <http://www.plosmedicine.org/>, Annals of Internal Medicine at <http://www.annals.org/>, and Epidemiology at <http://www.epidem.com/>). Information on the STROBE Initiative is available at [www.strobe-statement.org](http://www.strobe-statement.org).
